# Shedding light on the grey zone of speciation along a continuum of genomic divergence

Camille Roux<sup>1,2</sup>, Christelle Fraïsse<sup>1,2,3</sup>, Jonathan Romiguier<sup>1,4</sup>, Yoann Anciaux<sup>1,2</sup>, Nicolas Galtier<sup>1</sup> and Nicolas Bierne<sup>1,2</sup>

1 - Institut des Sciences de l'Évolution (UMR 5554), CNRS – Université Montpellier, Place Eugène Bataillon, 34095 Montpellier, France

2 - Station Marine, Université Montpellier, 2 rue des Chantiers, 34200 Sète, France

3 - Institute of Science and Technology, A-3400 Klosterneuburg, Austria

4 - Department of Ecology and Evolution, University of Lausanne, Lausanne, Switzerland

## Abstract

Speciation results from the progressive accumulation of mutations that decrease the probability of mating between parental populations, or reduce the fitness of hybrids – the so-called species barriers. The speciation genomic literature, however, is mainly a collection of case studies, each with its own approach and specificities, such that a global view of the gradual process of evolution from one to two species is currently lacking. Of primary importance is the prevalence of gene flow between diverging entities, which is central in most species concepts, and has been widely discussed in recent years. Here we explore the continuum of speciation thanks to a comparative analysis of genomic data from 61 pairs of populations/species of animals with variable levels of divergence. Gene flow between diverging gene pools is assessed under an Approximate Bayesian Computation (ABC) framework. We show that the intermediate, "grey zone" of speciation, in which taxonomy is often controversial, spans around one order of magnitude of net molecular divergence, from 0.5% to 4%, irrespective of species life-history traits or ecology. Thanks to appropriate modeling of among-loci variation in genetic drift and introgression rate, we clarify the status of the majority of ambiguous cases and uncover a number of cryptic species. Our framework also allowed to reveal the high incidence in animals of semi-isolated species, when some but not all loci are affected by barriers to gene flow, and highlights the intrinsic difficulty, both statistical and conceptual, of delineating species in the grey zone of speciation.

## Introduction

An important issue in evolutionary biology is understanding how the continuous-time process of speciation can lead to discrete entities - species. There is usually no ambiguity about species delineation when distant lineages are compared. The continuous nature of the divergence process, however, causes endless debates about the species status of closely-related lineages [1]. A number of definitions of species have thus been introduced over the 20th century, each of them using its own criteria - morphological, ecological, phylogenetic, biological, evolutionary or genotypic. A major problem is that distinct markers do not diverge in time at the same rate [2]. For instance, in some taxa, morphological differences evolve faster than the expression of hybrid fitness depression, which in turn typically establishes long before genome-wide reciprocal monophyly [3]. In other groups, morphology is almost unchanged between lineages that show high levels of molecular divergence [4]. The erratic behaviour and evolution of the various criteria is such that in a wide range of between-lineage divergence, named the grey zone of the speciation continuum, distinct species concepts do not converge to the same conclusions regarding species delineation [2].

Besides taxonomic aspects, the grey zone has raised an intense controversy regarding the genetic mechanisms involved in the formation of species [5–7]. Of peculiar importance is the question of gene flow between diverging lineages. How isolated two gene pools must be for speciation to begin? How long does gene flow persist as lineages diverge? Is speciation a gradual process of gene flow interruption, or a succession of periods of isolation and periods of contact? These questions are not only central in the speciation literature, but also relevant to the debate about species delineation, the ability of individuals to exchange genes being at the heart of the biological concept of species.

As genomic data have become easier and less expensive to obtain, sophisticated computational approaches have been developed to perform historical inferences in speciation genomics, *i.e.*, estimate the time of ancestral separation in two gene pools, changes in effective population size over evolutionary times, and the history of gene flow between the considered lineages [8–10]. Simulation-based Approximate Bayesian Computation (ABC) methods are particularly flexible and have recently attracted an increased attention in speciation genomics. One strength of ABC approaches is their ability to deal with complex, hopefully realistic models of speciation, and test for the presence or absence of ongoing introgression between sister lineages. This is achieved by simulating molecular data under alternative scenarios of speciation with or without current introgression, and choosing among scenarios based on their relative posterior probabilities [11].

Migration tends to homogenize allele content and frequency between diverging populations. This homogenizing effect, however, is often expected to only affect a fraction of the genome. This is because the effective migration rate is impeded in regions containing loci involved in assortative mating, hybrid fitness depression, or other mechanisms of isolation – the so-called genetic barriers [12]. Consequently, gene flow is best identified by models explicitly accounting for among-loci heterogeneity in introgression rates, as demonstrated by a number of recent studies [13–16]. When homogeneous introgression rate across the genome is assumed, distant lineages having accumulated a large number of genetic barriers can be inferred as currently isolated whereas they actually exchange alleles at loci unlinked to barriers [14]. Conversely, closely related lineages can be inferred as currently exchanging genes while some regions of the genome are already evolving independently [16,17] such that heterogeneous introgression models can provide support to the genic view of speciation [18]. Besides, introgression rates alone do not govern local patterns of genetic differentiation [19]. Directional selective processes, such as hitch-hiking effects [20] or background selection [21], are expected to affect the landscape of population differentiation by lowering polymorphism levels at particular loci, especially in low recombining or gene-dense genomic regions. Neglecting this confounding effect tends to inflate the proportion of false-positives in statistical tests of ongoing gene flow [19] and to mislead inferences [22]. Linked directional selection is expected to locally increase the stochasticity of allele frequency evolution, a process sometimes coined genetic draft [23]. Its effect can therefore be modeled by assuming that the effective population size,  $N_e$ , which determines the strength of genetic drift, varies among loci [24].

Multi-locus analyses of the process of population divergence has been achieved in various groups of animals [25,26] and plants [27–29] in which genome-wide data are available, revealing a diversity of patterns. These case studies, however, are limited in number and have taken different approaches, so that we still lack an unifying picture of the prevalence of gene flow during early divergence between gene pools. Here, we gathered a dataset of 61 pairs of populations/species of animals occupying a wide continuum of divergence level. Species were selected in order to sample the phylogenetic and ecological diversity of animals [30], irrespective of any aspect related to population structure or speciation. We investigated the effects of genomic divergence between populations on patterns of gene flow, paying attention to the ability of ABC methods to distinguish between competing scenarios and the influence of model assumptions.

## Results

### Simulations: ABC as a powerful approach to test for current introgression

Five distinct demographic scenarios were considered (Fig. 1), namely strict isolation (SI), ancient migration (AM), isolation with migration (IM), secondary contact (SC) and panmixia (PAN). The later three scenarios involve ongoing gene flow, whereas the former two do not. The posterior probabilities of the five scenarios were obtained under ABC by combining up to four different genomic models, which reflect alternative assumptions about the heterogeneity of linked-selection applying to distinct loci. The Homo model considers that most of the variation in the genome is unaffected by selection at linked sites or are equally affected, which is a standard assumption in demographic inference. The heteroN model accounts for the local effect of directional selection (background selection, selective sweeps) by assuming a variable effective population size among loci. The heteroM model accounts for the existence of local barriers to gene flow by assuming a variable (effective) migration rate among loci. The heteroM\_heteroN models, finally, combine the two kinds of heterogeneity.

We first assessed the power of the adopted ABC approach to distinguish between scenarios involving current isolation vs. current introgression. We simulated 20,000 different multilocus datasets, each comprising 100 loci, under each of SI, AM, IM and SC in the heteroM\_heteroN setting. Our ABC approach correctly supported current isolation for 98% of the datasets simulated under the SI or AM scenarios, and correctly rejected isolation for 99% of the datasets simulated under the IM or SC scenarios (Fig. 2-A). Similar robustness was found when gene flow was tested (Fig. 2-B). Results were hardly dependent on the sample size: similar results were obtained when we simulated samples of size two, three, 25 or 50 diploid individuals (Fig. S1). This analysis demonstrates the power and accuracy of our ABC approach to distinguish between situations of current introgression as opposed to current isolation.

Although data sets simulated under IM and SC were robustly attributed to scenarios allowing current introgression, the approach did not discriminate well between IM and SC. Datasets simulated under the SC scenario were assigned to SC with high confidence ( $P(\text{SC} | \text{SC}) > 0.8$ ; Material and Methods) only when the period of isolation before secondary contact was a large enough proportion of the total divergence time (Fig. 2-C). When relatively short periods of isolation were simulated, the method either assigned the datasets to IM ( $P(\text{IM} | \text{SC}) > 0.8$ ), or did not provide an elevated posterior probability to any demographic scenario ( $P(\text{SI} | \text{SC}) < 0.8 \cup P(\text{IM} | \text{SC}) < 0.8 \cup P(\text{AM} | \text{SC}) < 0.8 \cup P(\text{SC} | \text{SC}) < 0.8 \cup P(\text{PAN} | \text{SC}) < 0.8$ ; Fig. 2-D).

## **Dataset: molecular divergence and population differentiation in 61 taxa**

The posterior probability of ongoing gene flow was estimated in 61 pairs of sampled gene pools (Table S1) showing variable levels of molecular divergence (Table S2). 50 pairs were taken from a recent transcriptome-based population genomic study in animals [30], two individuals per population/species being analysed here. The datasets for the other 11 pairs of animal species were downloaded from the NCBI (Table S1). They correspond to sequences from published studies using either ABC, Ima [31] or MIMAR [32], for which three to 78 diploid individuals were analysed.

The amount of reproductive isolation between two lineages is expected to be related to the differences that have accumulated since their initial split, here estimated via the net synonymous divergence,  $d$ , which is the difference of between-populations to within-population heterozygosity calculated at synonymous sites [33].  $d$  ranged from  $5.10^{-5}$  (French vs. Danish populations of *Ostrea edulis*) to 0.309 (*Crepidula fornicata* vs. *C. plana*) in our dataset (Fig. S2). As expected,  $d$  was strongly correlated to  $F_{ST}$ , a classical measure of population differentiation, which took values ranging from 0 (between *Anas crecca shemya* and *A. crecca attu*) to 0.95 (between *Camponotus ligniperdus* and *C. aethiops*; Fig. S2-A). The across-loci variance in  $F_{ST}$  was minimal for low and high values of  $d$  (Fig. S2-B), which reflects an  $F_{ST}$  homogeneously low at early stages of divergence, homogeneously high at late stages of divergence, and heterogeneous among genes at intermediate levels of  $d$  (Fig. S2).

## **Statistical analysis: assessment of ongoing gene flow**

We investigated the prevalence of ongoing gene flow between diverging populations/species by fitting 16 different models under ABC. These represent the combinations of five demographic scenarios (SI, AM, IM, SC and panmixia) and four assumptions regarding the heterogeneity in introgression (for AM, IM and SC only) and drift rates (see above and Material and Methods). For each pair, the posterior probability that the two populations currently exchange migrants was estimated by summing the contributions of the PAN, IM and SC models (Fig. 1) and plotted as a function of  $d$ , the net synonymous divergence (Fig. 3). Results with other measures of divergence are also shown (Fig. S6, S7).

The 22 pairs in which  $d$  was lower than 0.5% received strong support for ongoing gene flow (Fig. 3). Over the continuum of divergence our analysis detects the first evidence of a semi-permeable barrier to gene flow at  $d \approx 0.075\%$ , a pair of *Malurus* (fairywren) species for which ABC strongly supports heterogeneity in  $M$ . When the net divergence was between 0.5% and 4%, inferences about gene flow were variable, and sometimes uncertain. In this area gene flow was strongly supported for five pairs, ABC did not distinguish between isolation and introgression for seven other pairs, and current isolation was strongly supported for the remaining five pairs. Strong support for current isolation was obtained for the 22 most divergent pairs of species, with  $d$  greater than 4%.

We investigated the impact of assumptions about genome-heterogeneous processes on the detection of current introgression (Fig. S3-S5). Pairs of populations with strong statistical support for ongoing migration tended to show among loci heterogeneity in introgression rates when  $d$  exceeded 0.1%. Not accounting for heterogeneity in introgression rate (heteroN and homoM\_homoN models) led to underestimating the importance of gene flow in several divergent pairs of species, consistent with previous reports (e.g. [15]). When we compared models assuming homogeneous *versus* heterogeneous effective population size across loci, we found that the former tended to overestimate the prevalence of ongoing gene flow (Fig. S4), again in line with published analyses [19]. Analyses assuming homogeneous  $N_e$  and/or  $M$  in many cases failed to support either isolation or migration, as illustrated by the wider grey zones visible in Fig. S5B, C and D. There was no significant effect of the net synonymous divergence on the probability of supporting genomic heterogeneity in effective population size in our data set.

### **No effect of habitat, phylogeny or life-history traits**

We investigated the influence of a number of ecological, phylogenetic and life-history variables on the posterior probability of ongoing gene flow. This was achieved under the heteroM\_heteroN model using data from [30]. We detected no significant effect of species longevity or log-transformed propagule size (size of the developmental stage that leaves the mother and disperses) on the log-transformed probability of ongoing gene flow. In the same vein, marine organisms ( $n=25$ ) did not exhibit a higher propensity for ongoing gene flow than terrestrial ones ( $n=36$ ;  $r^2$  below 0.01%). The log-transformed probability of ongoing gene flow was significantly higher ( $p\text{-val}=0.002$ ,  $r^2=0.14$ ) in vertebrates ( $n=20$ ) than in invertebrates ( $n=41$ ), but the effect disappeared when the level of divergence was controlled for (net synonymous divergence  $< 0.04$ : 17 vertebrate pairs, 22 invertebrate pairs,  $p=0.32$ ,  $r^2=0.03$ ). This effect only reflects the paucity of pairs of vertebrate population/species with a high divergence in our data set

## Ongoing gene flow and taxonomic status

Finally, we verified whether our inferences confirmed or contradicted the current taxonomy. Our dataset comprises 26 pairs of recognized species and 35 pairs of populations, or sub-species, sharing a common binomen. Eighteen of the 26 species pairs had  $d > 0.04$  and were inferred as being currently isolated. Of the remaining species pairs (with  $d < 0.04$ ), three were inferred as being isolated, two were inferred to be connected by heterogeneous gene flow (i.e. semi-isolated species), only two provided ambiguous results, and one, *Gorilla gorilla* vs. *G. beringei*, was found to be connected by homogeneous gene flow. Of the 35 pairs of populations from the same species, 24 were connected by gene flow (which was significantly heterogeneous in eight cases), five provided ambiguous results and six were inferred to be isolated – cryptic species. Genetic isolation has been previously suspected between northern and southern populations of *Pectinaria koreni* (trumpet worms) [34], between the blue and purple morphs of *Cystodytes dellechiaiei* (colonial ascidians) [35], and between the L1 and L2 lineages of *Allolobophora chlorotica* (earthworms) [36], but is here newly revealed between Moroccan and European populations of *Melitaea cinxia* (Glanville fritillary) and between Spanish and French populations of *A. chlorotica* L2.



## Discussion

We performed a comparative speciation genomics analysis in 61 pairs of populations/species from various phyla of animals. Our ABC analysis, which takes into account the confounding effect of linked selection heterogeneity, provides a first global picture of the prevalence of gene flow between diverging gene pools during the transition from one to two species.

### Accounting for among-loci heterogeneity in drift and migration rate

Inferring the history of divergence and gene flow, which determines the rate of accumulation of species barriers, is of prime importance to understand the process of speciation [17]. This can be achieved by various methods, among which ABC approaches have proven particularly flexible and helpful to compare alternative evolutionary scenarios. Our analysis of simulated datasets illustrates that ABC methods have the power to effectively discriminate recent introgression *versus* current isolation. Comparisons of alternative demographic models, however, can be strongly impacted by assumptions regarding the genomic distribution of effective population size ( $N_e$ ) and introgression rate ( $M$ ). Heterogeneities in  $N_e$  and  $M$  are common in natural populations as a result of selective processes applying either globally (background selection [19,33,37]) or specifically against migrants (genetic barriers [12,38]).

Following [13], we here introduced a framework in which each of the two effects, or both, can be readily accounted for. In our analysis, the number of pairs of populations/species for which ambiguous conclusions were reached was maximal when genomic heterogeneities of both migration and drift were neglected. Incorporating within genome variation in  $N_e$  tended to enhance the support for models with current isolation, as previously suggested [19]. The heteroN model makes a difference regarding inference of current gene flow between the highly divergent *Ciona intestinalis* and *C. robusta* species (see below). Conversely, incorporating heterogeneity in  $M$  doubled the number of pairs for which ongoing gene flow was supported, when compared to analyses with homogenous  $M$  where most of these pairs exhibited ambiguous results. Our study therefore underlines the importance of accounting for genomic heterogeneities for both  $N_e$  and  $M$  when comparing alternative scenarios of speciation [14,15,19], and calls for prudence regarding the conclusions to be drawn from the analysis of a single pair.



Among models assuming ongoing gene flow, our ABC analysis of simulated and empirical data often failed to discriminate between the Isolation-with-Migration and Secondary Contact models. These two scenarios yield similar signatures in genetic data, so that only relatively recent secondary contacts following long periods of interrupted gene flow can be detected with high confidence (Fig. 2D). Similarly, among models excluding ongoing gene flow, distinguishing between Strict Isolation and Ancient Migration was not possible in a substantial number of cases. These are challenges for future methodological research in the field, with important implications regarding, e.g., the debate about ecological vs. allopatric speciation [7,39].

### **Prevalent gene flow between recently diverged gene pools**

Although ABC analyses of particular pairs of populations can be affected by the choice of model of genomic heterogeneity, the overall relationship between net molecular divergence and detected ongoing gene flow was qualitatively similar among analyses. Pairs of populations diverging by less than 0.5% were found to currently exchange migrants. This includes populations that form a single panmictic gene pool, and pairs of diverging populations/species connected by gene flow. The low-divergence area contains pairs of populations showing conspicuous morphological differences, such as Eastern vs. Western gorilla or the *cuniculus* and *algerius* subspecies of rabbit (*Oryctolagus cuniculus*).

No pair of populations in this range of divergence was supported to be genetically isolated or yielded ambiguous results. It might be that, in some cases, populations are actually isolated (e.g., geographically) but the interruption of gene flow is too recent to be detected. The alternative interpretation is that pairs of populations in this range of divergence did not have the time to accumulate sufficiently strong and numerous genetic barriers, so that gene flow currently occurs at important rates. The detection of significantly heterogeneous introgression rate in low-diverged pairs ( $d < 0.5\%$ ) supports the latter explanation and demonstrates the rapid evolution of Dobzhansky-Muller incompatibilities [40]. A majority of the pairs from the low-divergence area, however, did not yield any evidence for among-loci heterogeneity of introgression rate. This might be explained, in some cases, by insufficient power to detect heterogeneous  $M$ . Alternatively, it might be that some pairs of populations/species in the low-divergence zone have differentially fixed mutations with major effects on hybrid fitness while other have not, due to mutational stochasticity and/or across-taxa differences in the genetic architecture of barriers – i.e., simple (two locus) vs. complex incompatibilities, and strength of associated selective effects [41].

## Suppressed gene flow at high sequence divergence

At the other end of the continuum, it appears that above a divergence of a few percent, barriers are strong enough to completely suppress gene flow: all pairs of species with  $d > 0.04$  were found to have reached reproductive isolation with strong support. This might result from impaired homologous recombination due to improper pairing of dissimilar homologous chromosomes at meiosis, which would reduce the fecundity of hybrids [42,43]. Of note, the 4% threshold is of the order of magnitude of the maximal level of within-species genetic diversity reported in animals [30], somewhat consistent with the hypothesis of a physical constraint imposed by sequence divergence on the ability to reproduce sexually. Alternatively, the 4% figure may represent a threshold above which Dobzhansky-Muller incompatibilities are normally in sufficient number and strength to suppress introgression. The two hypotheses are not mutually exclusive, but pertain to distinctive processes of genetic isolation; the former would be maximally expressed during F1 hybrid meiosis, while the latter would affect recombined, mosaic individuals carrying alleles from the two gene pools at homozygous state.

In the high-divergence area, no instance of among-loci heterogeneous migration was detected, indicating that introgression is blocked across the whole genome in these pairs of species. A number of highly divergent species pairs yielded support for among loci heterogeneous  $N_e$ , suggesting that the same regions of the genome are under strong background selection in the two diverging entities – presumably regions of reduced recombination and/or high density in functional elements. Neglecting the genomic heterogeneity in  $N_e$  can lead to false inference of gene flow. For instance, allowing genomic heterogeneity in  $M$  but not in  $N_e$  led to strong statistical support for a secondary contact between the highly divergent *Ciona intestinalis* (formerly *C. intestinalis B*) and *C. robusta* (formerly *C. intestinalis A*) species (Figure S5), consistent with [14], but accounting for heterogeneity in both  $M$  and  $N_e$  supported a scenario of strict isolation. The among-loci variance in  $F_{st}$  between these two species, which was interpreted as reflecting introgression at few loci in [14], is here better explained by heterogeneity in  $N_e$  than in  $M$ .

# Intermediate divergence levels: the grey zone of speciation

The area of intermediate divergence unveils the grey zone of the speciation continuum. This grey zone is both statistical, because this is the zone where it is difficult to discriminate among models, and conceptual, because this is where semi-isolated genetic backgrounds are mostly found, the situation under which taxonomic conundrums flourish. Contrasted situations co-exist within the grey zone, with strong statistical support for gene flow in some pairs of populations/species, for isolation in others, and cases of ambiguous conclusions about the demographic history. Researchers should be ready to face problems regarding demographic inference, and therefore parameter estimation, when conducting a project of speciation genomics falling in the grey zone. In this analysis, only two diploid individuals per population/species were used, for the sake of comparability between data sets (in many populations no more than two individuals are available), and due to computational limitation. Our evaluation of the effect of sample size on ABC-based demographic inference suggested that two individuals per population are sufficient to capture the main signal (Fig. S1).

Our analysis revealed significant among-loci heterogeneous migration in as many as ten pairs of populations/species (Fig. 3). This illustrates the commonness of semi-permeable genomes at intermediate levels of speciation, when some, but not all, genomic regions are affected by barriers to gene flow. Accounting for the heterogeneity in introgression rate is therefore crucially needed for proper demographic inference in these pairs. For instance, the mussel species *M. galloprovincialis* and *M. edulis* are the most divergent pair for which ongoing introgression was detected, but this only appeared when the genomic variation in *M* was accounted for – the homo and heteroN models yielded ambiguous conclusions about this pair of species, in which the existence of semi-permeable barriers has previously been demonstrated [44,45].

Besides mussels, heterogeneous gene flow was newly detected between American and European populations of *Armadillidium vulgare* (wood lice) and *Artemia franciscana* (brine shrimp), between Atlantic and Mediterranean populations of *Sepia officinalis* (cuttlefish), and between the closely related *Eudyptes chrysolophus moseleyi* vs. *E. c. filholi* (penguins) and *Macaca mulatta* vs. *M. fascicularis* (macaques) – in addition to the previously documented mouse [46], rabbit [47] and fairywren [48] cases. The grey zone, finally, includes populations between which unsuspected genetic isolation was here revealed, such as the Moroccan vs. European populations of *Melitaea cinxia* (Glanville fritillary), and the Spanish vs. French populations of *A. chlorotica* L2 (earthworm), which according to our analysis correspond to cryptic species. Our genome-wide approach and proper modeling of heterogeneous processes therefore clarified the status of a number of pairs from the grey zone, emphasizing the variety of situations and the conceptual difficulty with species delineation in this range of divergence.

### **Implications for speciation and conservation research**

Our dataset is composed of a large variety of taxa with deep phylogenetic relationships and diverse life history traits. In principle, the propensity to evolve pre-zygotic barriers might differ between groups of organisms (e.g. broadcast spawners versus copulating species, [49]). We did not detect any significant effect of species biological/ecological features or taxonomy on the observed pattern. Highly polymorphic broadcast spawners and low diversity large vertebrates with strong parental investment are equally likely to undergo current gene flow, for a given divergence level. Whether the pace of accumulation of genetic barriers, the so-called speciation clock, varies among taxonomic group is a major challenge in speciation research and requires the dissection of the temporal establishment of barriers in many different taxas [50,51]. State-of-the-art ABC methods offer the opportunity to investigate the genome-wide effect of barriers to gene flow in natural populations but cannot provide answers about how and why barriers have evolved. However, our report of a strong and general relationship between molecular divergence and genetic isolation across a wide diversity of animals suggests that, at the genome level, speciation operates in a more or less similar fashion in distinct taxa, irrespective of biological and ecological peculiarities.

The width of the grey zone indicates that a number of existing taxonomic debates regarding species definition and delineation are difficult by nature and unlikely to be resolved through the analysis of a limited number of loci. Most of the molecular ecology literature, however, is based on datasets consisting of mitochondrial DNA and rarely more than a dozen microsatellite loci. The time when genome-wide data will be available in most species of interest is approaching though not yet reached. Since then, we have to accept that knowledge about the existence of gene flow between diverged entities could not be settled from genetic data alone in a substantial fraction of taxa. In addition, our study highlights the commonness of semi-isolated entities, between which gene flow can be demonstrated but only concerns a fraction of loci, challenging the species concept for some, demonstrating the ubiquity of interspecific gene flow for others. We should therefore be prepared to make decisions regarding conservation and management of biodiversity in absence of well-defined species boundaries.

## **Materials and Methods**

### **Taxon sampling**

A total of 61 pairs of populations/species of animals were analyzed (Table S1). These include 10 pairs taken from the speciation literature and 51 pairs newly created here based on a recently published RNAseq dataset [30], which includes 96 species of animals from 31 distinct families and eight phyla, and one to eleven individuals per species. Twenty-nine of the newly created pairs corresponded to distinct populations within a named species. Populations were here defined based on a combination of geographic, ecotypic and genetic criteria: we contrasted groups of individuals (i) living in allopatry and/or differing in terms of their ecology, and (ii) clustering as distinct lineages in a neighbour-joining analysis of genetic distances between individuals. The two most covered individuals per population were selected for ABC analysis. In four species three distinct populations were identified, in which case the three possible pairwise comparisons were performed. Results were qualitatively unchanged when we kept a single pair per species. Twenty-two of the newly created pairs consisted of individuals from two distinct named species that belonged to the same family. Again, the two most covered individuals per species were selected for analysis. In the case of species in which several populations had been identified, we chose to sample two individuals from the same population for between-species comparison. When more than two species from the same family were available, we selected a single pair based on a combination of sequencing coverage and genetic distance criteria, comparisons between closely related species being favored. Raw and final datasets are available from the PopPhyl website (<http://kimura.univ-montp2.fr/PopPhyl/>). Sample sizes, number of loci and source of data are listed in Table S1.

### **Transcriptome assembly, read mapping, coding sequence prediction**

For the 51 recently obtained pairs, Illumina reads were mapped to predicted cDNAs (contigs) with the BWA program [52]. Contigs with a per-individual average coverage below  $\times 2.5$  were discarded. Open reading frames (ORFs) were predicted with the Trinity package [53]. Contigs carrying no ORF longer than 200 bp were discarded. In contigs including ORFs longer than 200 bp, 5' and 3' flanking non-coding sequences were deleted, thus producing predicted coding sequences that are hereafter referred to as loci.

## Calling single nucleotide polymorphisms (SNPs) and genotypes

At each position of each locus and for each individual, diploid genotypes were called using the reads2snps program [54]. This method first estimates the sequencing error rate in the maximum-likelihood framework, calculates the posterior probability of each possible genotype, and retains genotypes supported at >95% if ten reads per position and per individual were detected. Possible hidden paralogs (duplicated genes) were filtered using a likelihood ratio test based on explicit modeling of paralogy. For our demographic inferences only synonymous positions were retained. Synonymous length and positions were then computed for each loci using polydNdS [55].

## Summary statistics

For all of the 61 pairs of populations/species, we calculated an array of 31 statistics widely used for demographic inferences [32,56–58]. The average and standard variation over loci for: (1) the number of biallelic positions; (2) the number of fixed differences between the two gene pools; (3) the number of polymorphic sites specific to each gene pools; (4) the number of polymorphic sites existing in both gene pools; (5) Wald and Wolfowitz statistics [59]; (6) Tajima's  $\pi$  [60]; (7) Watterson's  $\theta$  [61]; Tajima's  $D$  for each gene pools [62]; (8) the gross divergence between the two gene pools ( $d_{xy}$ ); (9) the net divergence between the two gene pools ( $d_a$ ); (10)  $F_{st}$  measured by  $1 - p_w/p_T$  where  $p_w$  is the average allelic diversity based on the two gene pools and  $p_T$  is the total allelic diversity over the two gene pools; (11) the Pearson's  $R^2$  correlation coefficient in  $p$  calculated between the two gene pools. Observed values of summary statistics are summarized for each species in table-S2.



## Demographic scenarios

Five distinct demographic scenarios were considered: panmixia (PAN), Strict Isolation (SI), Ancestral Migration (AM), Isolation with Migration (IM) and Secondary Contact (SC, Fig. 1). The PAN scenario assumes that the two investigated gene pools are sampled from a single panmictic population of size  $N_e$ . The SI scenario describes the subdivision of an ancestral panmictic population of size  $N_{anc}$  in two isolated gene pools of sizes  $N_{pop-1}$  and  $N_{pop-2}$ . The two sister gene pools then evolve in absence of gene flow. Under the IM scenario, the two sister gene pools that split  $T_{split}$  generations ago continuously exchange alleles as they diverge. Under the AM scenario gene flow occurs between  $T_{split}$  and a more recent  $T_{AM}$  date, after which the two gene pools evolve in strict isolation. The SC scenario assumes an early divergence in strict isolation followed by a period of gene flow that started  $T_{SC}$  generations ago.

## Heterogeneity in introgression and effective population size

We assumed that the effects of selection on linked sites can be described in terms of heterogeneous effective population size (putatively affecting all demographic models) and/or migration rate (only affecting the IM, AM and SC models). In the homoM setting, one gene flow parameter ( $M=N.m$ ) is randomly sampled from a uniform prior distribution for each direction.  $M_1$  is the direction from gene pool 2 to gene pool 1 and  $M_2$  is the direction from gene pool 1 to gene pool 2. All loci share the same  $M_1$  and  $M_2$  values, but  $M_1$  and  $M_2$  are independently sampled. In the heteroM setting a specific migration rate is attributed per locus and per direction of migration. Thus, for each direction, a hyper-prior is first randomly designed as a Beta distribution. A value of  $M_{1,i}$  and  $M_{2,i}$  is then drawn for each loci  $i$  from the two hyper-priors. In the homoN setting, the effective population sizes  $N_{anc}$  (ancestral population),  $N_{pop-1}$  (gene pool 1) and  $N_{pop-2}$  (gene pool 2) are independent but shared by all loci. In the heteroN setting, heterogeneity in effective population size is independently modeled for the three populations (ancestor, gene pool 1 and gene pool 2). For each population, a proportion  $a$  of loci is assumed to evolve neutrally and share a common value for  $N_{anc}$ ,  $N_{pop-1}$  or  $N_{pop-2}$ ,  $a$  being sampled from the uniform prior [0 - 1]. The remaining loci, in proportion  $1-a$ , are assumed to be affected by natural selection at linked loci. They are assigned independent values of  $N$ , which are sampled from Beta distributions defined on the intervals  $[0 - N_{anc}]$ ,  $[0 - N_{pop-1}]$  and  $[0 - N_{pop-2}]$ . In this setting  $a$  and  $N_e$  differ between the three populations but are sampled from distributions sharing the same shape parameters.

## Approximate Bayesian Computation

The combination of demographic scenarios and genomic settings resulted in a total of 16 distinct models, namely the homoN and heteroN versions of PAN and SI, and the homoM\_homoN, homoM\_heteroN, heteroM\_homoN, heteroM\_heteroN versions of IM, AM and SC. Model fit assessment and parameter estimation were performed under the ABC framework. 3,000,000 of multilocus simulations under each model were conducted using the coalescent simulator msnsam [57,63]. For each of the 61 pairs of populations/species the posterior probability of each model was estimated using a feed-forward neural network implementing a nonlinear multivariate regression by considering the model itself as an additional parameter to be inferred under the ABC framework using the R package “abc” [64]. The 10,000 replicate simulations (out of  $16 \times 3,000,000$ ) falling nearest to the observed values of summary statistics were selected, and these were weighted by an Epanechnikov kernel that peaks when  $S_{obs} = S_{sim}$ . Computations were performed using 50 trained neural networks and 10 hidden networks in the regression. The posterior probability of each model was obtained by averaging over ten replicated ABC analysis.

## Robustness

Among a set of compared models, ABC returns a best-supported model  $M$  and its posterior probability  $P_M$ . The returned model is validated when  $P_M$  is above an arbitrary threshold  $X$ , which was here set to 0.8. The robustness of the inference, *i.e.*, the probability to correctly support model  $M$  if true, obviously depends on  $X$ . To assess the reliability of our approach, we randomly simulated 20,000 pseudo-observed datasets (PODs) for each of the  $m$  compared models. Simulations were independent of the  $3,000,000 \times m$  reference simulations used for model comparisons in our main analysis, but their parameters share the same boundaries.

For each simulated POD, we estimated the posterior probabilities  $P_i$  ( $0 < i < m+1$ ) of the  $m$  compared models through ABC. The probability of correctly supporting  $M$  given  $X$  was

calculated as: 
$$P(P_M > X | M) / \left[ \sum_{i=1}^m P(P_M > X | i) \right]$$
 where  $P(P_M > X | i)$  is the probability that

a dataset simulated under  $m$  will be supported by ABC as being  $M$  with a posterior probability above  $X$  [56]. This is the proportion, among datasets inferred by ABC to correspond to  $M$ , of those actually generated under  $M$ .

For the “ongoing gene flow” vs “current isolation” model comparison, we found that robustness is above 0.9995 if  $P_M \geq 0.8$ . This implies that using a posterior probability of threshold of 0.8, we can assert “ongoing gene flow” or “current isolation” to a pair of populations/species with a risk of error of 0.05% - assuming that one of the models used in this analysis is true. For datasets with  $P_M$  between 0.2 and 0.8, we did not attribute a best model but treated them as “ambiguous cases”.

All of the informatic codes and command lines used to produce the analysis are openly available online (<https://github.com/popgenomics/popPhylABC>).

## Acknowledgments

We thank Vincent Castric, Pierre-Alexandre Gagnaire, Xavier Vekemans and John Welch for insightful discussions. The computations were performed at the Vital-IT (<http://www.vital-it.ch>) Center for high-performance computing of the SIB Swiss Institute of Bioinformatics and the ISEM computing cluster at the platform Montpellier Bioinformatique et Biodiversité of the LabEx CeMEB. NB was funded by the Agence Nationale de la Recherche (HYSEA project, ANR-12-BSV7- 0011). NG was funded by the European Research Council (advanced grant 232971). This is article 2016-XXX of Institut des Sciences de l'Evolution de Montpellier.

## References

1. Coyne JA, Orr HA. Speciation. Sinauer Associates Sunderland, MA; 2004.
2. De Queiroz K. Species concepts and species delimitation. Syst Biol. 2007;56: 879–886.
3. Dettman JR, Sirjusingh C, Kohn LM, Anderson JB. Incipient speciation by divergent adaptation and antagonistic epistasis in yeast. Nature. 2007;447: 585–588.
4. Amato A, Kooistra WHCF, Ghiron JHL, Mann DG, Pröschold T, Montresor M. Reproductive isolation among sympatric cryptic species in marine diatoms. Protist. 2007;158: 193–207.
5. Mayr E. Animal species and evolution. Belknap Press of Harvard University Press Cambridge, Massachusetts; 1963.
6. Gavrillets S. Fitness landscapes and the origin of species. Princeton University Press Princeton, NJ; 2004.
7. Bolnick DI, Fitzpatrick BM. Sympatric Speciation: Models and Empirical Evidence. Annu Rev Ecol Evol Syst. Annual Reviews; 2007;38: 459–487.
8. Excoffier L, Dupanloup I, Huerta-Sánchez E, Sousa VC, Foll M. Robust demographic inference from genomic and SNP data. PLoS Genet. 2013;9: e1003905.
9. McCormack JE, Maley JM, Hird SM, Derryberry EP, Graves GR, Brumfield RT. Next-generation sequencing reveals phylogeographic structure and a species tree for recent bird divergences. Mol Phylogenet Evol. 2012;62: 397–406.
10. Emerson BC, Paradis E, Thébaud C. Revealing the demographic histories of species using DNA sequences. Trends Ecol Evol. 2001;16: 707–716.
11. Csilléry K, Blum MGB, Gaggiotti OE, François O. Approximate Bayesian Computation (ABC) in practice. Trends Ecol Evol. 2010;25: 410–418.
12. Barton N, Bengtsson BO. The barrier to genetic exchange between hybridising populations. Heredity. 1986;57: 357–376.
13. Sousa VMC, Carneiro M, Ferrand N, Hey J. Identifying Loci Under Selection Against Gene Flow in Isolation with Migration Models. Genetics. 2013; genetics.113.149211–.
14. Roux C, Tsagkogeorga G, Bierne N, Galtier N. Crossing the species barrier: genomic hotspots of introgression between two highly divergent *Ciona intestinalis* species. Mol Biol Evol. 2013;30: 1574–1587.
15. Roux C, Fraïsse C, Castric V, Vekemans X, Pogson GH, Bierne N. Can we continue to neglect genomic variation in introgression rates when inferring the history of speciation? A case study in a *Mytilus* hybrid zone. J Evol Biol. 2014;27: 1662–1675.
16. Tine M, Kuhl H, Gagnaire P-A, Louro B, Desmarais E, Martins RST, et al. European sea bass genome and its variation provide insights into adaptation to euryhalinity and speciation. Nat Commun. 2014;5: 5770.
17. Sousa V, Hey J. Understanding the origin of species with genome-scale data: modelling gene flow. Nat Rev Genet. 2013;advance on. doi:10.1038/nrg3446

18. Wu C-I. The genic view of the process of speciation. *J Evol Biol.* 2001;14: 851–865.
19. Cruickshank TE, Hahn MW. Reanalysis suggests that genomic islands of speciation are due to reduced diversity, not reduced gene flow. *Mol Ecol.* 2014;23: 3133–3157.
20. Smith JM, Haigh J. The hitch-hiking effect of a favourable gene. *Genet Res.* 1974;23: 23–35.
21. Charlesworth B, Morgan MT, Charlesworth D. The effect of deleterious mutations on neutral molecular variation. *Genetics.* 1993;134: 1289–1303.
22. Ewing GB, Jensen JD. The consequences of not accounting for background selection in demographic inference. *Mol Ecol.* 2015; doi:10.1111/mec.13390
23. Gillespie JH. Is the population size of a species relevant to its evolution? *Evolution.* 2001;55: 2161–2169.
24. Charlesworth B. Fundamental concepts in genetics: effective population size and patterns of molecular evolution and variation. *Nat Rev Genet.* 2009;10: 195–205.
25. Nadachowska-Brzyska K, Burri R, Olason PI, Kawakami T, Smeds L, Ellegren H. Demographic divergence history of pied flycatcher and collared flycatcher inferred from whole-genome re-sequencing data. *PLoS Genet.* 2013;9: e1003942.
26. Warmuth V, Eriksson A, Bower MA, Barker G, Barrett E, Hanks BK, et al. Reconstructing the origin and spread of horse domestication in the Eurasian steppe. *Proc Natl Acad Sci U S A.* 2012;109: 8202–8206.
27. Roux C, Pannell JR. Inferring the mode of origin of polyploid species from next-generation sequence data. *Mol Ecol.* 2015;24: 1047–1059.
28. Ross-Ibarra J, Tenaillon M, Gaut BS. Historical divergence and gene flow in the genus *Zea*. *Genetics.* 2009;181: 1399–1413.
29. Diez CM, Trujillo I, Martinez-Urdiroz N, Barranco D, Rallo L, Marfil P, et al. Olive domestication and diversification in the Mediterranean Basin. *New Phytol.* 2015;206: 436–447.
30. Romiguier J, Gayral P, Ballenghien M, Bernard A, Cahais V, Chenuil A, et al. Comparative population genomics in animals uncovers the determinants of genetic diversity. *Nature.* 2014;515: 261–263.
31. Hey J, Nielsen R. Integration within the Felsenstein equation for improved Markov chain Monte Carlo methods in population genetics. *Proc Natl Acad Sci U S A.* 2007;104: 2785–2790.
32. Becquet C, Przeworski M. A new approach to estimate parameters of speciation models with application to apes. *Genome Res.* 2007;17: 1505–1519.
33. Charlesworth B. Measures of divergence between populations and the effect of forces that reduce variability. *Mol Biol Evol.* 1998;15: 538–543.
34. Jolly MT, Viard F, Gentil F, Thiébaud E, Jollivet D. Comparative phylogeography of two coastal polychaete tubeworms in the Northeast Atlantic supports shared history and vicariant events: comparative phylogeography of coastal tubeworms. *Mol Ecol.* 2006;15: 1841–1855.

35. López-Legentil S, Turon X. Population genetics, phylogeography and speciation of Cystodytes (Ascidiacea) in the western Mediterranean Sea. *Biol J Linn Soc Lond*. 2006;88: 203–214.
36. Dupont L, Grésille Y, Richard B, Decaëns T, Mathieu J. Dispersal constraints and fine-scale spatial genetic structure in two earthworm species. *Biol J Linn Soc Lond*. 2015;114: 335–347.
37. Noor MAF, Bennett SM. Islands of speciation or mirages in the desert? Examining the role of restricted recombination in maintaining species. *Heredity*. 2009;103: 439–444.
38. Harrison RG. Hybrid zones and the evolutionary process. Oxford University Press; 1993. p. 364.
39. Barton NH. What role does natural selection play in speciation? *Philos Trans R Soc Lond B Biol Sci*. 2010;365: 1825–1840.
40. Corbett-Detig RB, Zhou J, Clark AG, Hartl DL, Ayroles JF. Genetic incompatibilities are widespread within species. *Nature*. 2013;504: 135–137.
41. Fraïsse C, Elderfield JAD, Welch JJ. The genetics of speciation: are complex incompatibilities easier to evolve? *J Evol Biol*. 2014;27: 688–699.
42. Fraser C, Hanage WP, Spratt BG. Recombination and the nature of bacterial speciation. *Science*. 2007;315: 476–480.
43. Opperman R, Emmanuel E, Levy AA. The effect of sequence divergence on recombination between direct repeats in *Arabidopsis*. *Genetics*. 2004;168: 2207–2215.
44. Bierne, Borsa, Daguin, Jollivet, Viard, Bonhomme, et al. Introgression patterns in the mosaic hybrid zone between *Mytilus edulis* and *M. galloprovincialis*. *Mol Ecol*. 2003;12: 447–461.
45. Bierne N, Bonhomme F, David P. Habitat preference and the marine-speciation paradox. *Proc Biol Sci*. 2003;270: 1399–1406.
46. Janousek V, Václav J, Liuyang W, Ken L, Petra D, Vyskocilova MM, et al. Genome-wide architecture of reproductive isolation in a naturally occurring hybrid zone between *Mus musculus musculus* and *M. m. domesticus*. *Mol Ecol*. 2012;21: 3032–3047.
47. Carneiro M, Blanco-Aguilar JA, Villafuerte R, Ferrand N, Nachman MW. Speciation in the European rabbit (*Oryctolagus cuniculus*): islands of differentiation on the X chromosome and autosomes. *Evolution*. 2010;64: 3443–3460.
48. Baldassarre DT, White TA, Karubian J, Webster MS. Genomic and morphological analysis of a semipermeable avian hybrid zone suggests asymmetrical introgression of a sexual signal. *Evolution*. 2014;68: 2644–2657.
49. Nydam ML, Harrison RG. Introgression despite substantial divergence in a broadcast spawning marine invertebrate. *Evolution*. 2011;65: 429–442.
50. Matute DR, Butler IA, Turissini DA, Coyne JA. A test of the snowball theory for the rate of evolution of hybrid incompatibilities. *Science*. 2010;329: 1518–1521.
51. Moyle LC, Nakazato T. Hybrid incompatibility “snowballs” between *Solanum* species. *Science*. 2010;329: 1521–1523.

52. Li H, Durbin R. Fast and accurate short read alignment with Burrows-Wheeler transform. *Bioinformatics*. 2009;25: 1754–1760.
53. Grabherr MG, Haas BJ, Yassour M, Levin JZ, Thompson DA, Amit I, et al. Full-length transcriptome assembly from RNA-Seq data without a reference genome. *Nat Biotechnol*. 2011;29: 644–652.
54. Tsagkogeorga G, Turon X, Galtier N, Douzery EJP, Delsuc F. Accelerated evolutionary rate of housekeeping genes in tunicates. *J Mol Evol*. 2010;71: 153–167.
55. Thornton K. Libsequence: a C++ class library for evolutionary genetic analysis. *Bioinformatics*. 2003;19: 2325–2327.
56. Fagundes NJR, Ray N, Beaumont M, Neuenschwander S, Salzano FM, Bonatto SL, et al. Statistical evaluation of alternative models of human evolution. *Proc Natl Acad Sci U S A*. 2007;104: 17614–17619.
57. Ross-Ibarra J, Wright SI, Foxe JP, Kawabe A, DeRose-Wilson L, Gos G, et al. Patterns of polymorphism and demographic history in natural populations of *Arabidopsis lyrata*. *PLoS One*. 2008;3: e2411.
58. Roux C, Castric V, Pauwels M, Wright SI, Saumitou-Laprade P, Vekemans X. Does speciation between *Arabidopsis halleri* and *Arabidopsis lyrata* coincide with major changes in a molecular target of adaptation? *PLoS One*. 2011;6: e26872.
59. Wald A, Wolfowitz J. On a Test Whether Two Samples are from the Same Population. *Ann Math Stat*. Institute of Mathematical Statistics; 1940;11: 147–162.
60. Tajima F. Evolutionary relationship of DNA sequences in finite populations. *Genetics*. 1983;105: 437–460.
61. Watterson GA. On the number of segregating sites in genetical models without recombination. *Theor Popul Biol*. 1975;7: 256–276.
62. Tajima F. The effect of change in population size on DNA polymorphism. *Genetics*. 1989;123: 597–601.
63. Hudson RR. Generating samples under a Wright-Fisher neutral model of genetic variation. *Bioinformatics*. 2002;18: 337–338.
64. Csilléry K, François O, Blum MGB. abc: an R package for approximate Bayesian computation (ABC). *Methods Ecol Evol*. 2012;3: 475–479.



## Figures

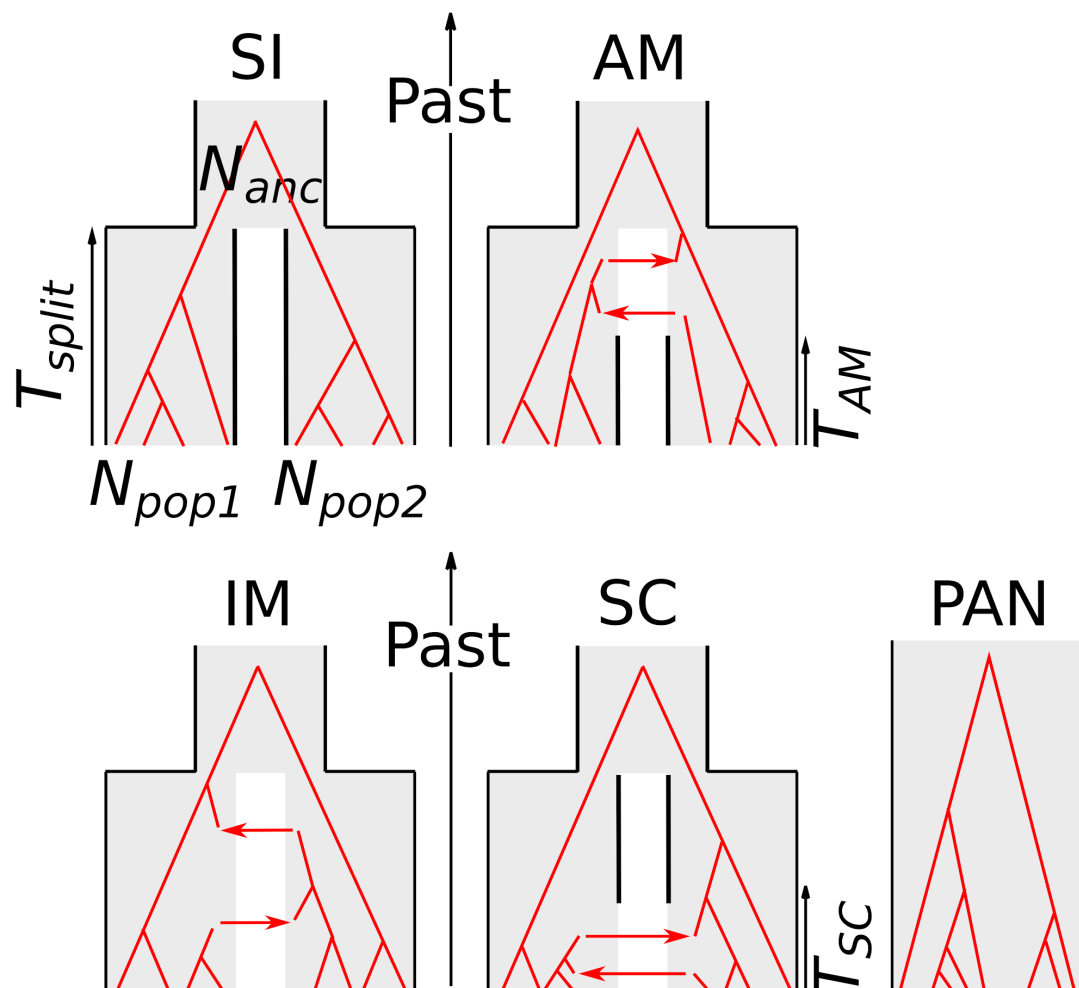

**Figure 1. Compared alternative scenarios of speciation**

SI=Strict Isolation: subdivision of an ancestral diploid panmictic population (of size  $N_{anc}$ ) in two diploid populations (of constant sizes  $N_{pop1}$  and  $N_{pop2}$ ) at time  $T_{split}$ . AM=Ancestral Migration: the two newly formed populations continue to exchange alleles until time  $T_{AM}$ . IM=Isolation with Migration: the two daughter populations continuously exchange alleles until present time. SC=Secondary Contact: the daughter populations first evolve in isolation then experience a secondary contact and start exchanging alleles at time  $T_{SC}$ . PAN: Panmictic scenario. All individuals are sampled from the same panmictic population. Red phylogenies represent possible gene trees under each alternative scenarios.

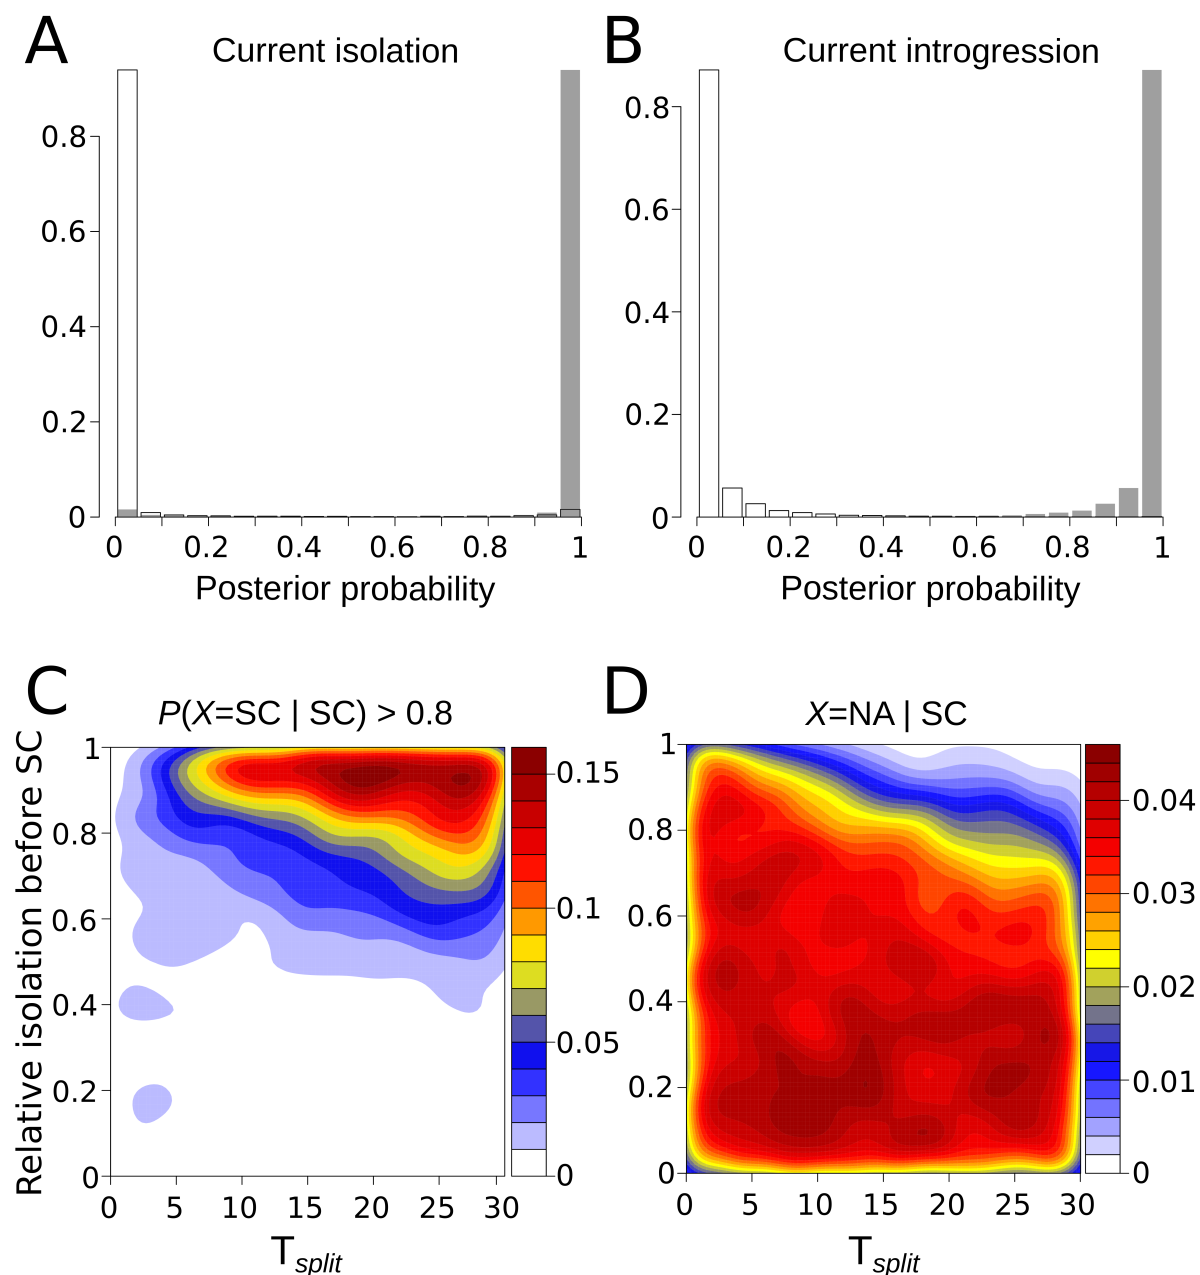

**Figure 2. ABC analysis of randomly simulated datasets**

(A) Distribution of the posterior probability that the two daughter species are currently isolated ( $P_{SI+AM}$ ) computed over 20,000 randomly simulated datasets for each of SI and AM (grey bars) and for each of IM and SC scenarios (white bars).

(B) Distribution of the posterior probability that the two daughter species currently introgress ( $P_{IM+SC}$ ) computed over 20,000 randomly simulated datasets for each of IM and SC scenarios (grey bars) and for each of SI and AM scenarios (white bars).

(C) Two-dimensional space of parameters of the SC scenario showing simulations leading to a correct support of SC (i.e.  $P(SC | SC) > 0.8$ ). X-axis represents the time since the ancestral split. Y-axis represents the relative time the two daughter species remained isolated before the secondary contact. Colors represent the density in simulations with  $P(SC | SC) > 0.8$ .

(D) Two-dimensional space of parameters of the SC scenario showing simulations leading to the absence of a robust conclusion using ABC. Colors represent the density in simulations with  $P(SI | SC) < 0.8 \cup P(IM | SC) < 0.8 \cup P(AM | SC) < 0.8 \cup P(SC | SC) < 0.8 \cup P(PAN | SC) < 0.8$ .

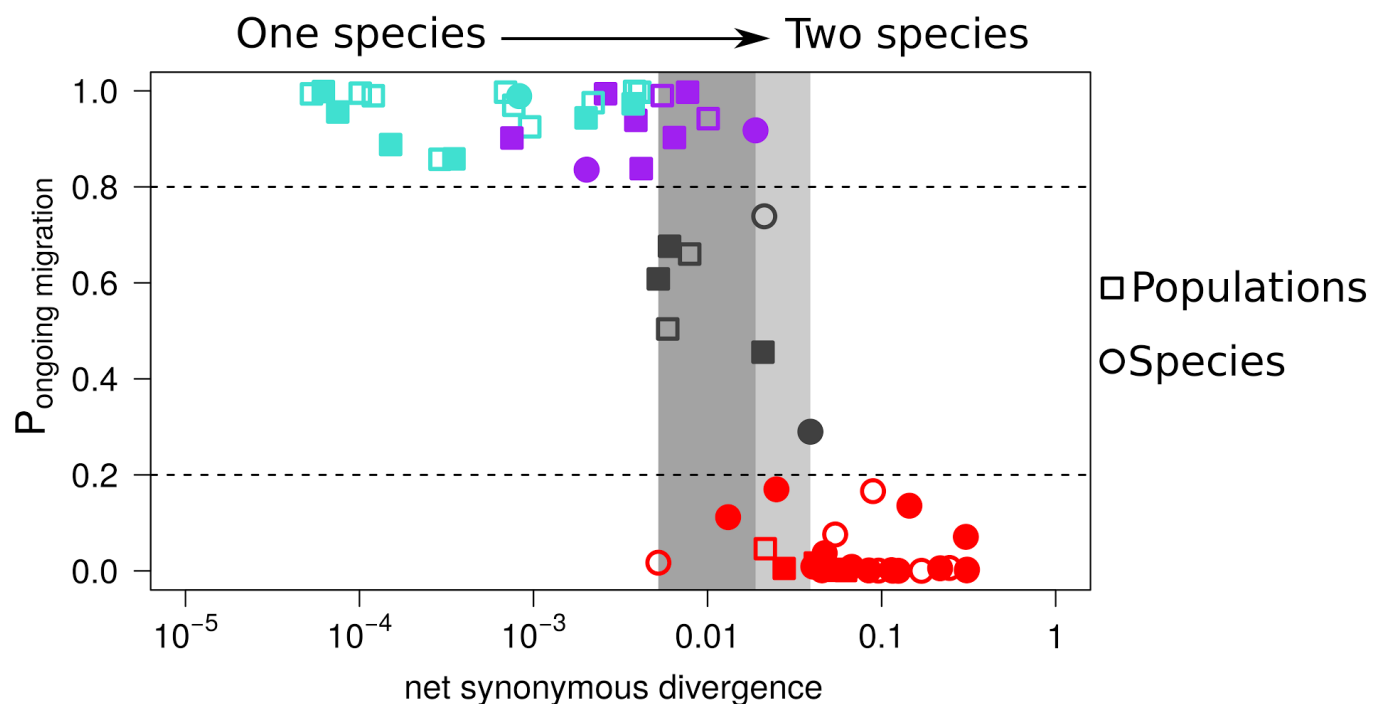

**Figure 3. Probability of ongoing gene flow along a continuum of molecular divergence**

Each dot is for one pair of populations/species. X-axis: net molecular divergence measured at synonymous positions (log10 scale) and averaged across loci. Y-axis: relative posterior probability of ongoing gene flow (i.e., SC, IM and PAN scenarios) estimated by ABC. Red dots: pairs with a strong support for current isolation. Grey dots: with no strong statistical support for any demographic scenarios. Blue dots: pairs with strong statistical support for genome-homogeneous ongoing gene flow. Purple dots: pairs with strong statistical support for genome-heterogeneous ongoing gene flow. Filled symbols: pairs with a strong support for genome-heterogeneous  $N_e$ . Open symbols: genomic-homogeneous  $N_e$ . The light grey rectangle spans the range of net synonymous divergence in which ambiguous pairs are found. The overlapping dark grey rectangle spans the range of net synonymous divergence in which both currently isolated and currently connected pairs are found.

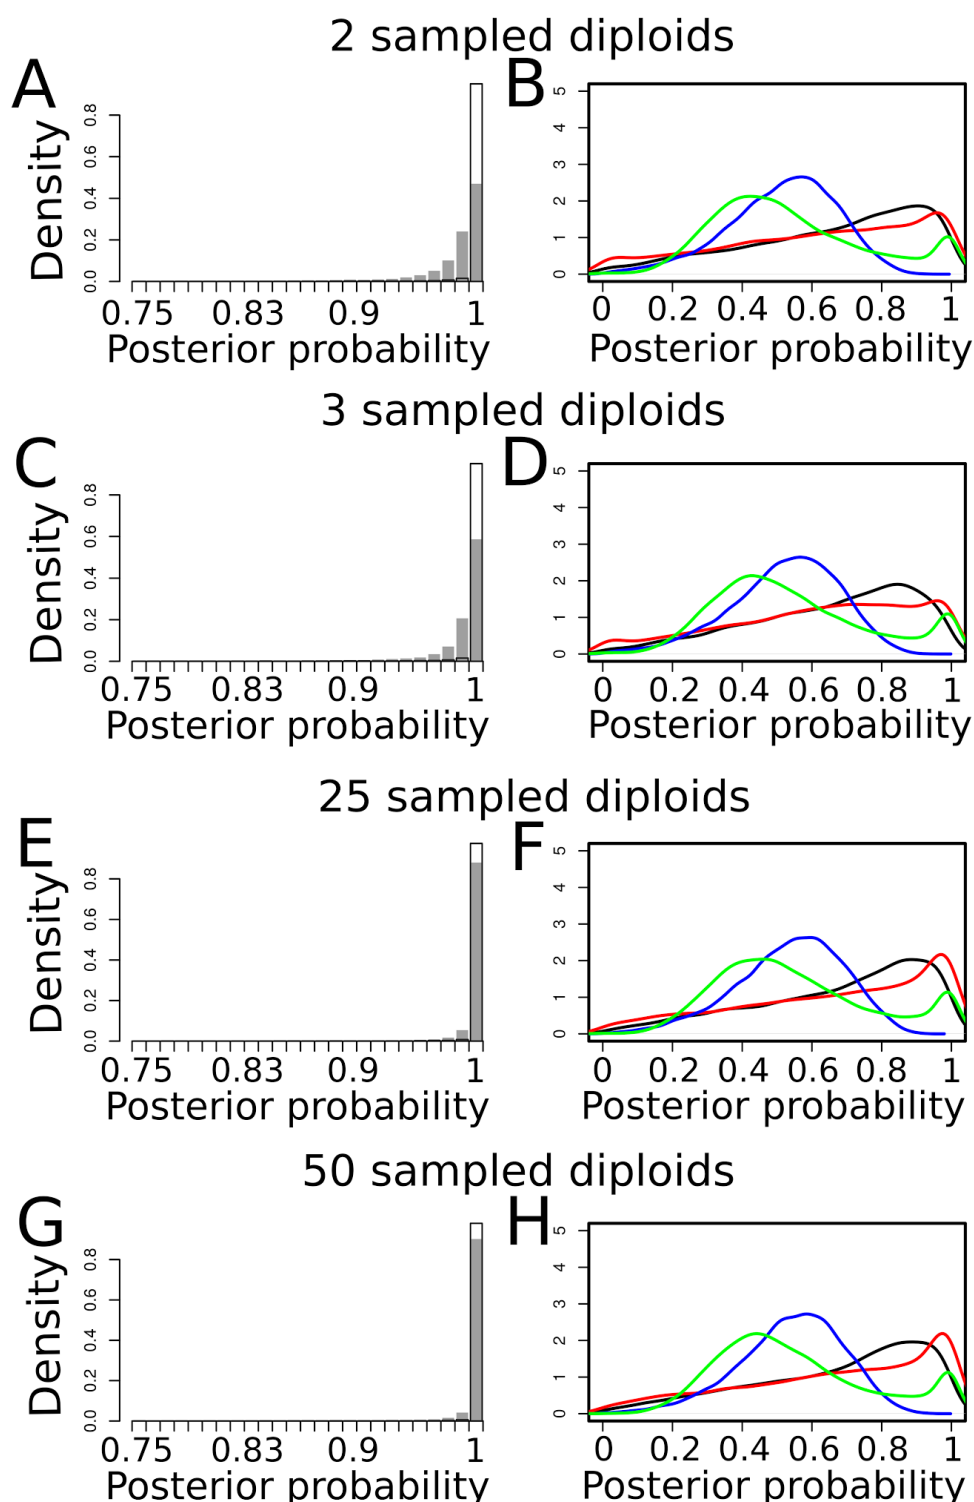

**Figure S1. Effects of the number of sampled individuals on robustness of model comparisons when 100 loci are investigated.**

Analyses were made by simulating four different datasets:

- A-B: 100 loci sampled in two diploid individuals in each daughter species.
- C-D: 100 loci sampled in three diploid individuals in each daughter species.
- E-F: 100 loci sampled in 25 diploid individuals in each daughter species.

G-H: 100 loci sampled in 50 diploid individuals in each daughter species.  
Panels on the left border show the distributions of  $P(\text{current isolation} \mid \text{current isolation})$  (white bars) and  $P(\text{current introgression} \mid \text{current introgression})$  (grey bars) measured after ABC analysis of 20,000 PODs simulated under each scenarios.  
Panels on the right border show the distributions of  $P(\text{SI} \mid \text{SI})$  (black lines),  $P(\text{AM} \mid \text{AM})$  (red lines),  $P(\text{IM} \mid \text{IM})$  (blue lines) and  $P(\text{SC} \mid \text{SC})$  (green bars) measured after ABC analysis of 20,000 PODs simulated under each scenarios.



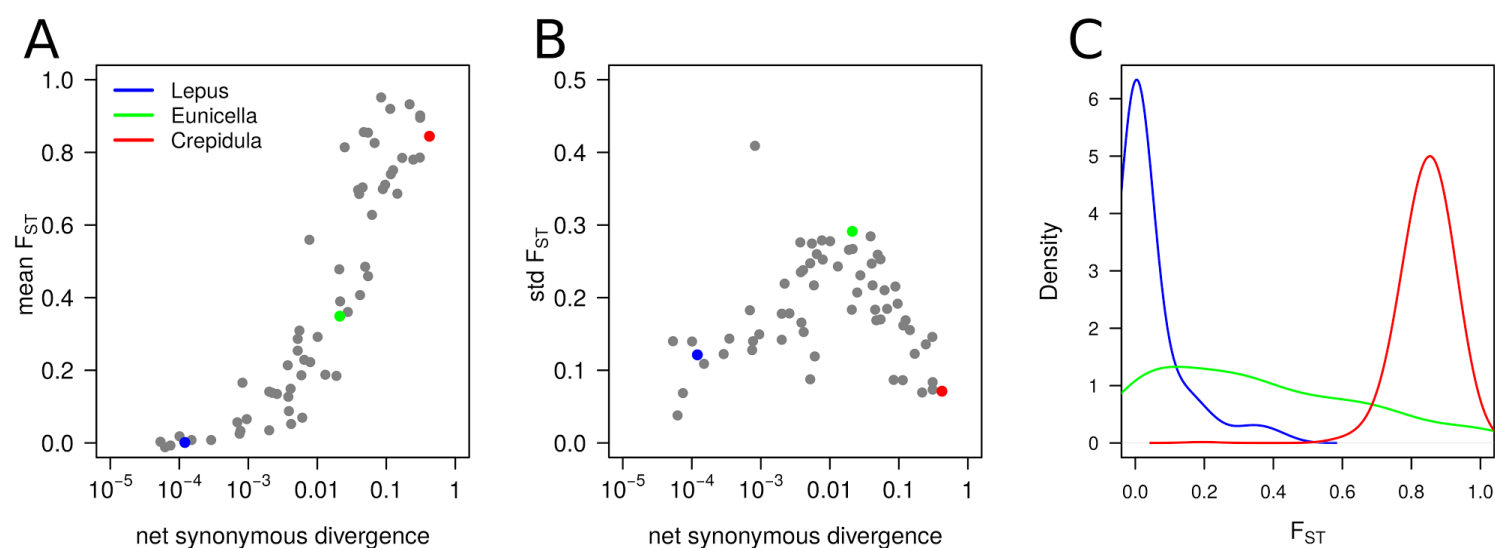

**Figure S2. Relation between synonymous divergence and genetic differentiation.**

A. Each grey dot represents a pair of species/populations. *Lepus* (Spanish and Portuguese populations of *Lepus granatensis*), *Eunicella* (*Eunicella cavolinii* and *E. verrucosa*) and *Crepidula* (*Crepidula fornicata* and *Bostrycapulus aculeatus*) indicate representative pairs of poorly, intermediately and highly divergent species/populations.

B. Effect of divergence on across-loci variance in  $F_{ST}$ .

C. Genomic distribution of  $F_{ST}$  for the *Lepus*, *Eunicella* and *Crepidula* datasets.

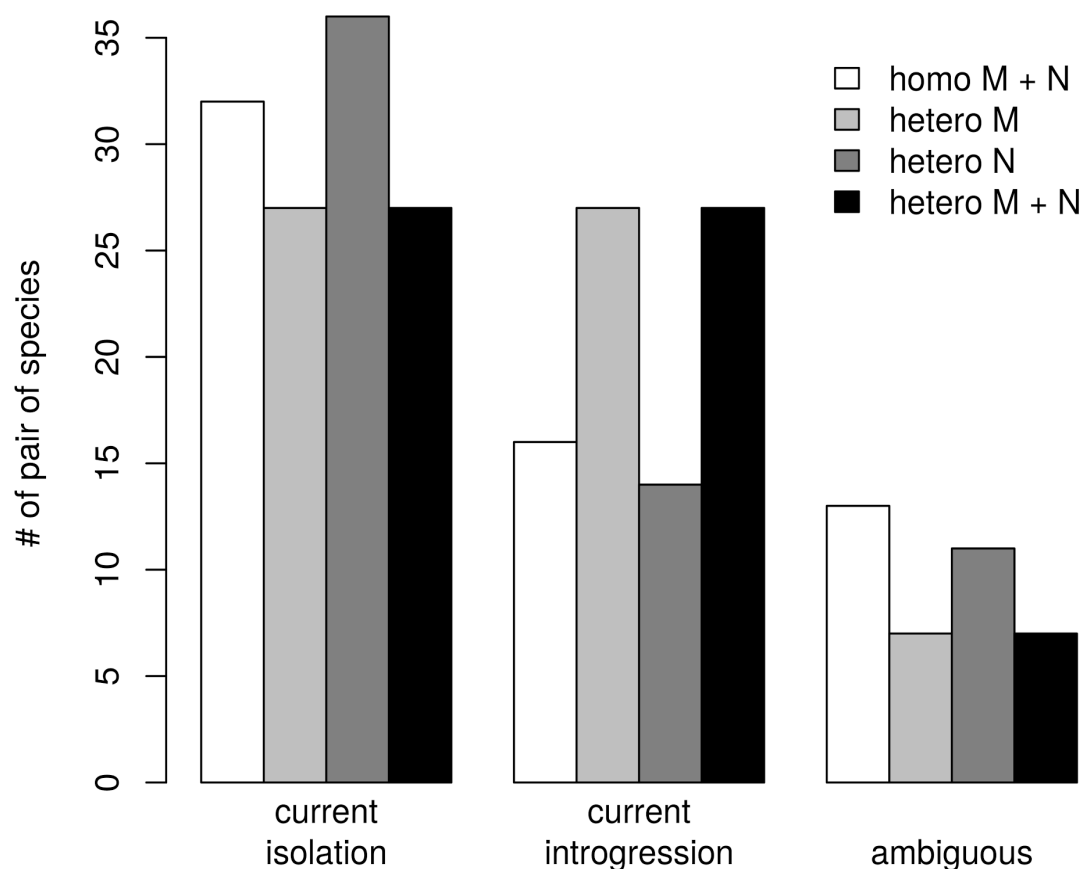

**Figure S3. Number of pair of species supporting current isolation, current introgression or ambiguity in model choice**

A pair of species is associated to “Current isolation” if the sum of posterior probabilities  $P(SI) + P(AM)$  is greater than 0.8.

A pair of species is associated to “Current introgression” if the sum of posterior probabilities  $P(SC) + P(IM)$  is greater than 0.8.

The ambiguous status is attributed to a pair of species when neither  $P(SI) + P(AM)$  nor  $P(SC) + P(IM)$  nor  $P(Panmixia)$  is greater than 0.8.

The “homo M + N” analysis was made by assuming an unique genomic introgression rate and an unique  $N_e$  over the whole genome.

The “hetero M” analysis takes into account genomic variation in introgression rates over the whole genome.

The “hetero N” analysis takes into account genomic variation in  $N_e$ .

The “hetero M + N” analysis takes into account genomic variation in introgression rates and in  $N_e$ .

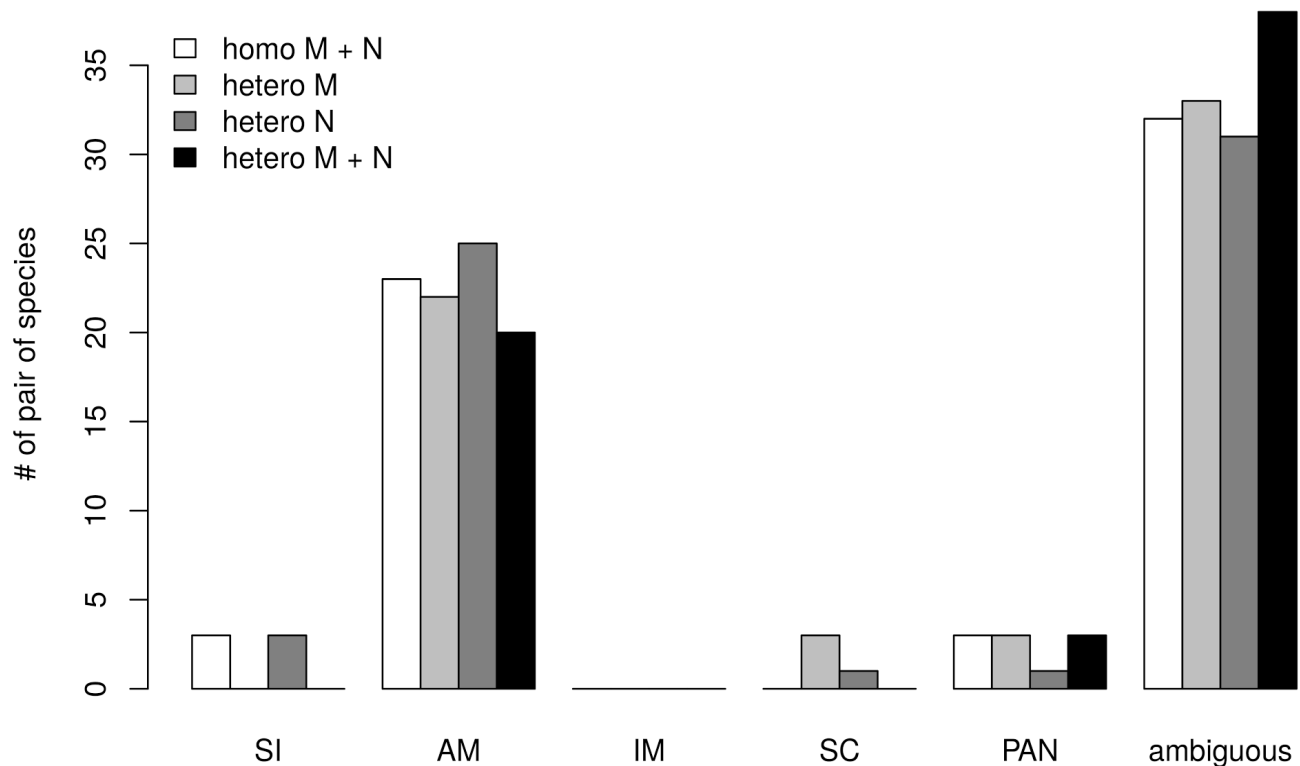

**Figure S4. Number of pair of species showing evidences for SI, AM, IM, SC, PAN or ambiguity in model choice for three distinct ABC analysis.**

A pair of species is associated to any of the four models of speciation if its relative posterior probability is greater than 0.8.

The “homo M + N” analysis was made by assuming an unique genomic introgression rate and an unique  $N_e$  over the whole genome.

The “hetero M” analysis takes into account genomic variation in introgression rates over the whole genome.

The “hetero N” analysis takes into account genomic variation in  $N_e$ .

The “hetero M + N” analysis takes into account genomic variation in introgression rates and in  $N_e$ .

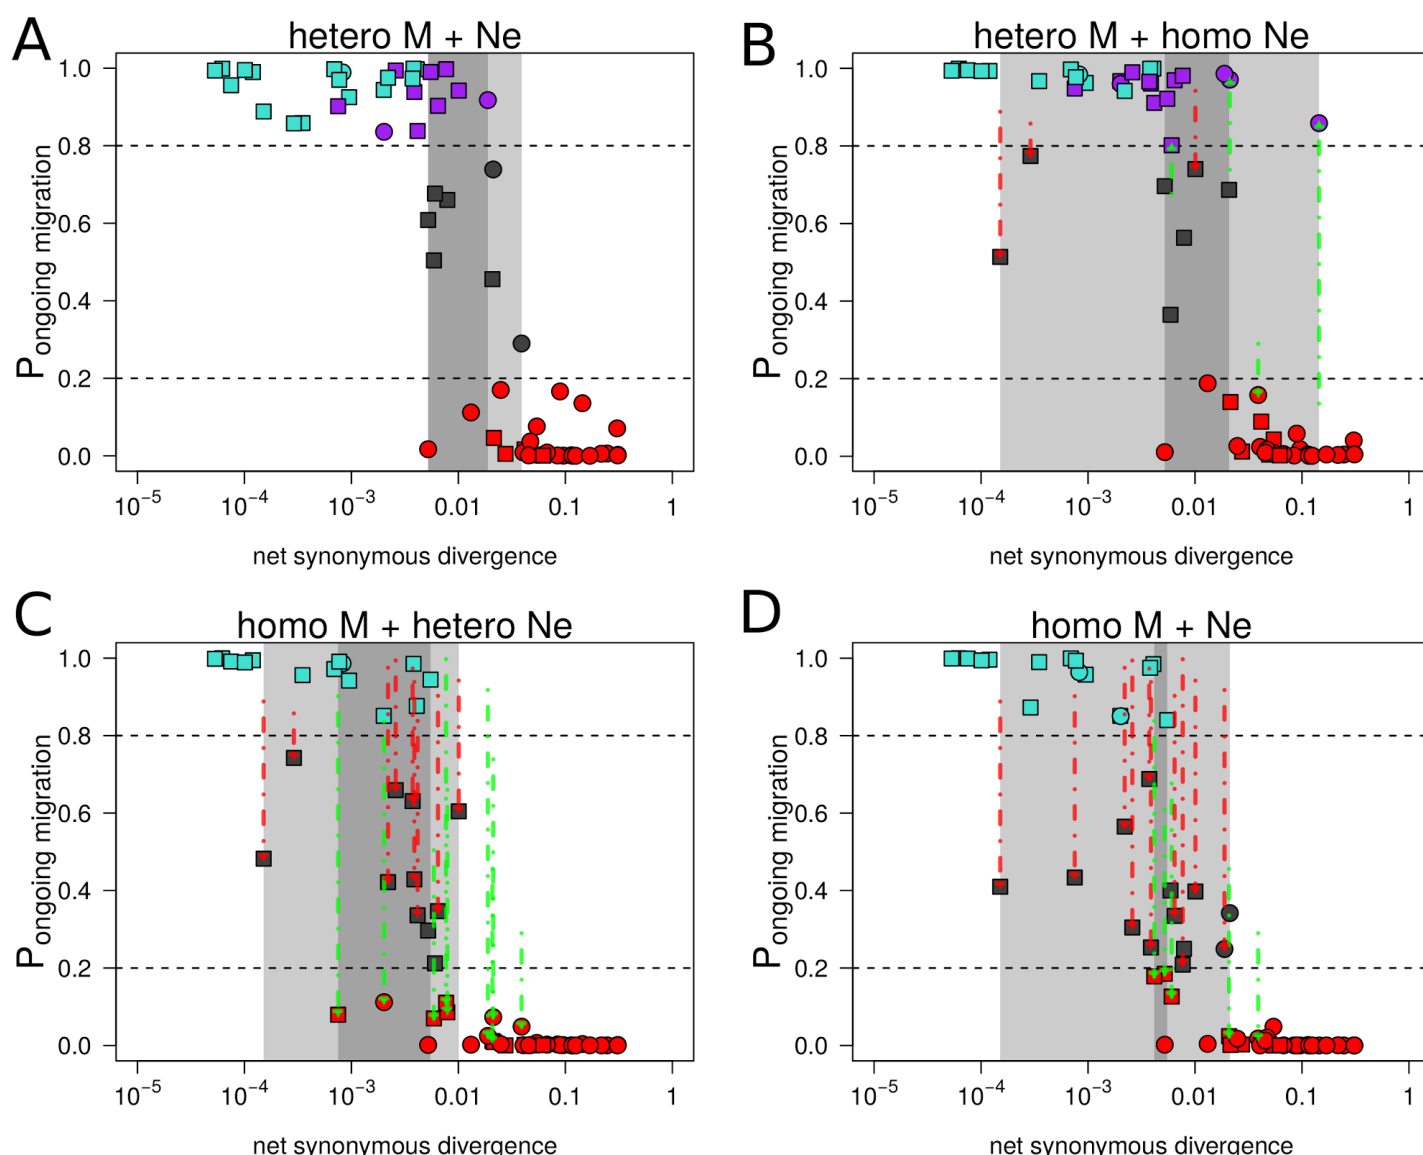

**Figure S5. Relation between net synonymous divergence and probability of ongoing gene flow**

Net synonymous divergence is the average proportion of differences at synonymous positions between individuals sampled in the two compared species due to mutations occurring after the ancestral split.

The “hetero M + Ne” analysis was made by assuming genomic variation for both  $M$  and  $Ne$ .

The “hetero M” analysis solely takes into account genomic variation in introgression rates over the whole genome.

The “hetero Ne” analysis solely takes into account genomic variation in  $Ne$ .

The “homo M + Ne” analysis considers one value of  $M$  and one value of  $Ne$  shared by the whole genome.

Red arrows indicate pairs of species inferred as ambiguous in heteroM, heteroNe and homoM\_homoN analysis but not in heteroM\_heteroN.

Green arrows indicate pairs of species with different and unambiguous inferences made in heteroM, heteroNe and homoM\_homoN when compared to heteroM\_heteroN.

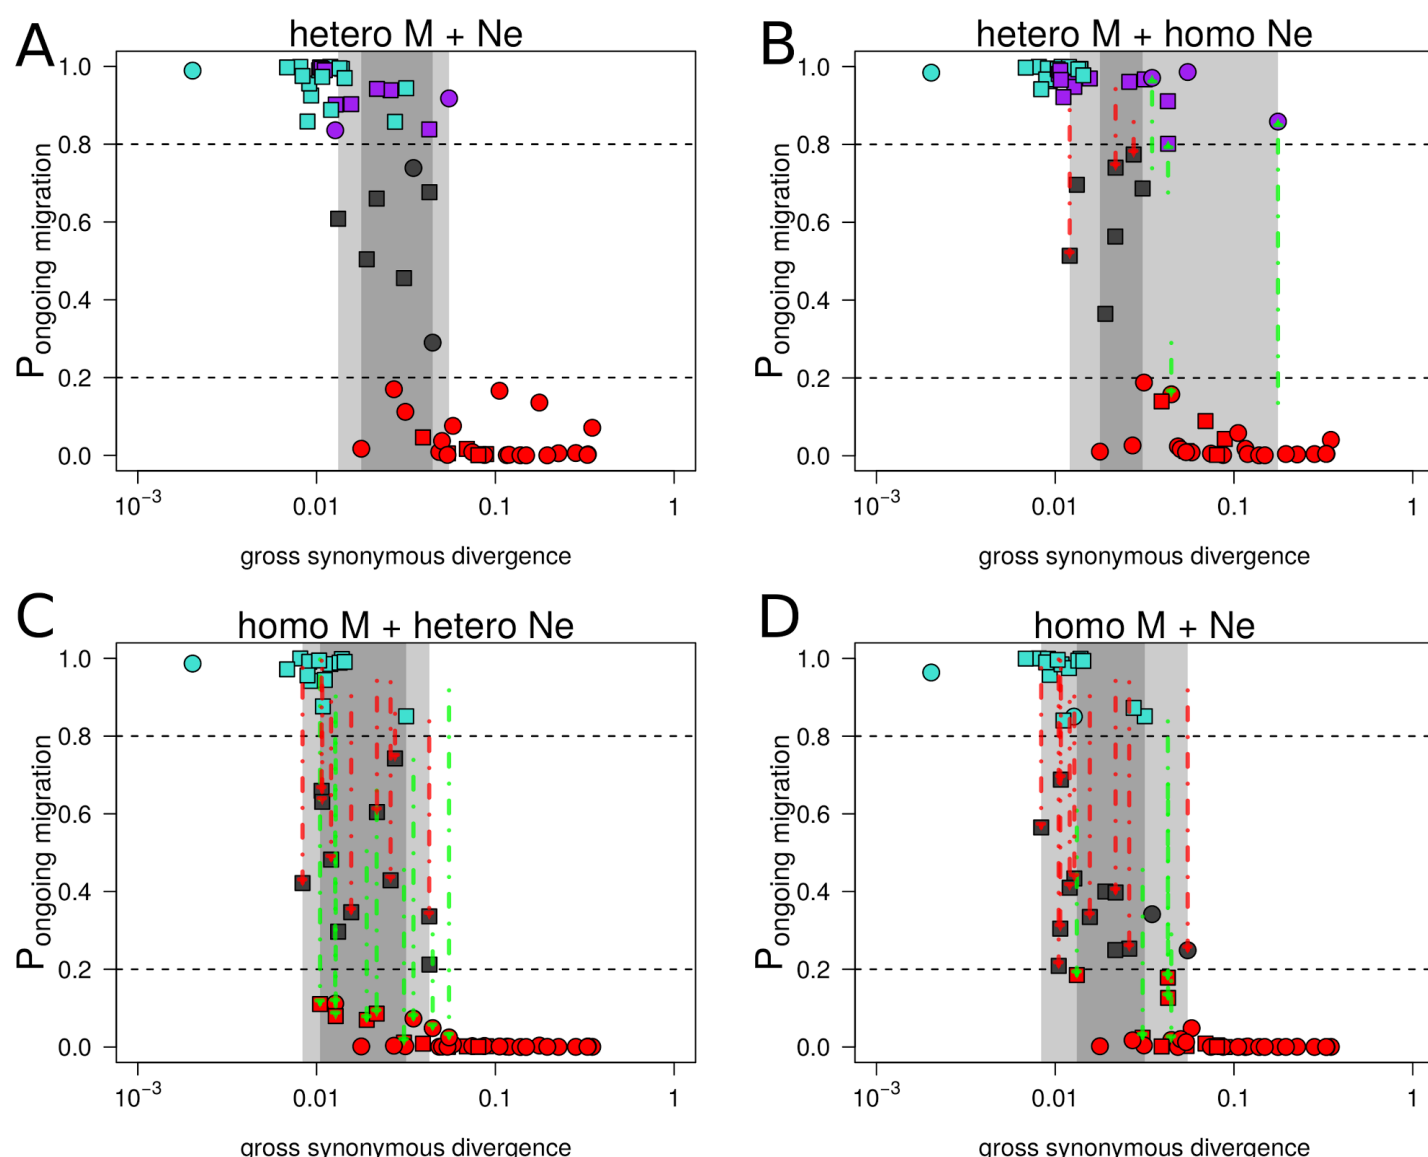

**Figure S6. Relation between gross synonymous divergence and probability of ongoing gene flow**

Gross synonymous divergence is the average proportion of differences at synonymous positions between individuals sampled in the two compared species, including differences present in the ancestral species.

The “hetero M + Ne” analysis was made by assuming genomic variation for both *M* and *Ne*.

The “hetero M” analysis solely takes into account genomic variation in introgression rates over the whole genome.

The “hetero Ne” analysis solely takes into account genomic variation in *Ne*.

The “homo M + Ne” analysis considers one value of *M* and one value of *Ne* shared by the whole genome.

Red arrows indicate pairs of species inferred as ambiguous in heteroM, heteroNe and homoM\_homoN analysis but not in heteroM\_heteroN.

Green arrows indicate pairs of species with different and unambiguous inferences made in heteroM, heteroNe and homoM\_homoN when compared to heteroM\_heteroN.



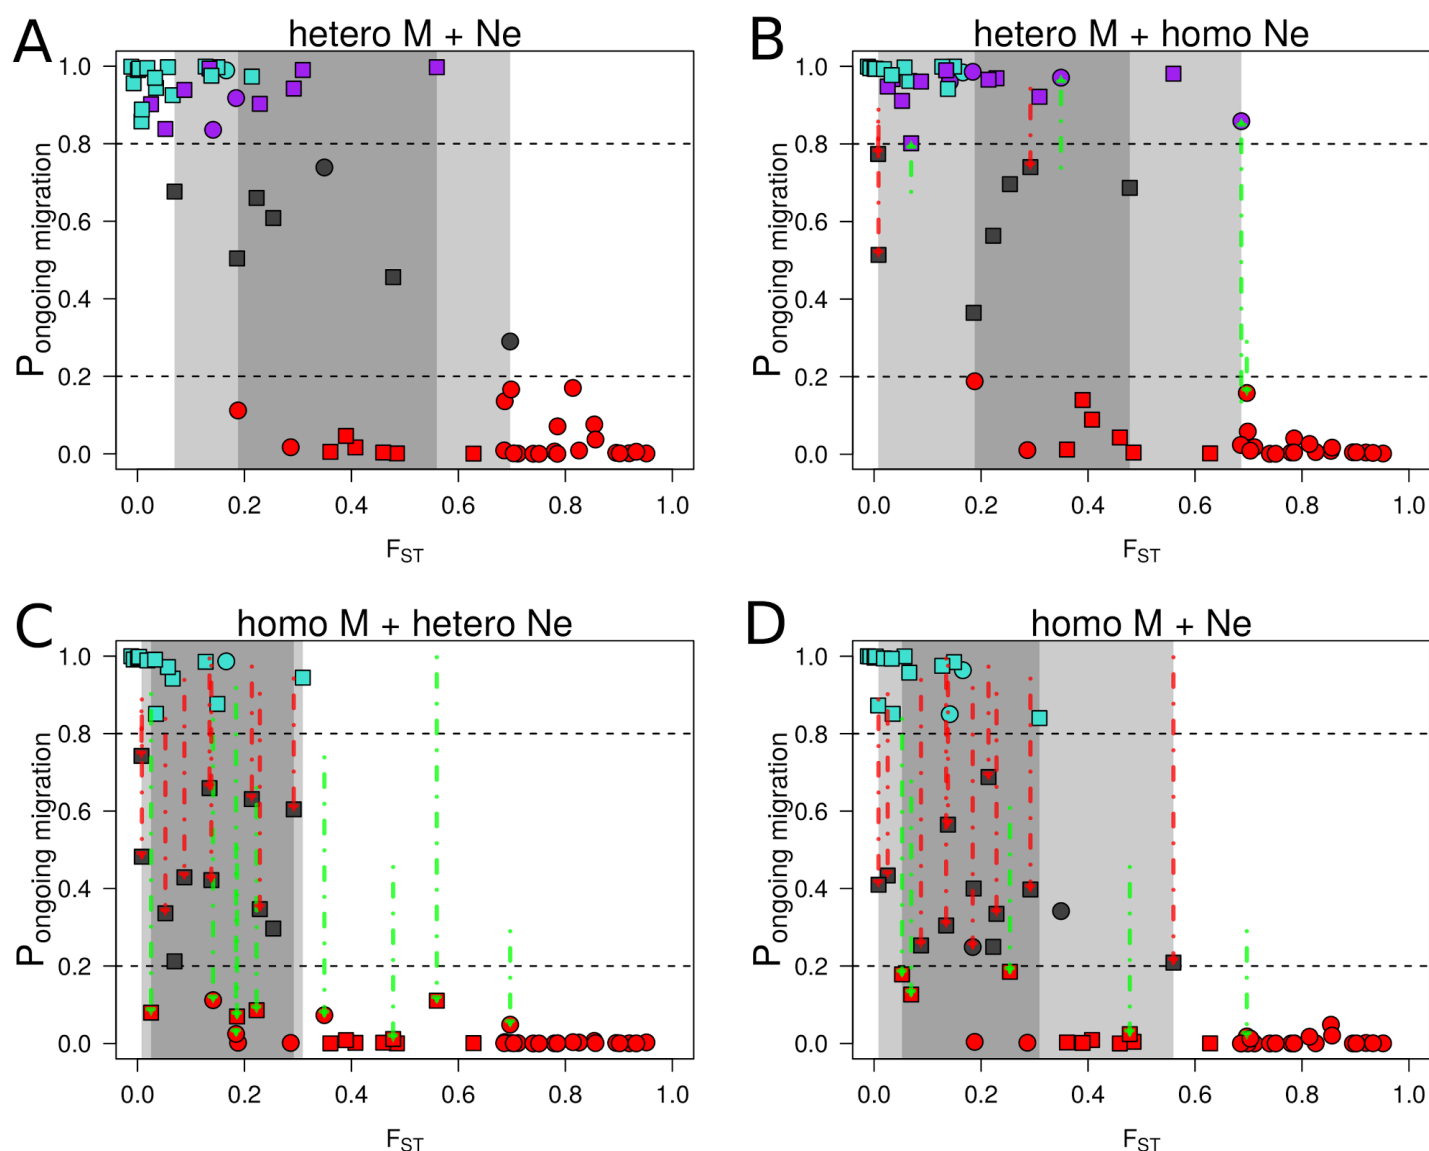

**Figure S7. Relation between  $F_{ST}$  and probability of ongoing gene flow**

The “hetero M + Ne” analysis was made by assuming genomic variation for both  $M$  and  $Ne$ .

The “hetero M” analysis solely takes into account genomic variation in introgression rates over the whole genome.

The “hetero Ne” analysis solely takes into account genomic variation in  $Ne$ .

The “homo M + Ne” analysis considers one value of  $M$  and one value of  $Ne$  shared by the whole genome.

Red arrows indicate pairs of species inferred as ambiguous in heteroM, heteroNe and homoM\_homoN analysis but not in heteroM\_heteroN.

Green arrows indicate pairs of species with different and unambiguous inferences made in heteroM, heteroNe and homoM\_homoN when compared to heteroM\_heteroN.

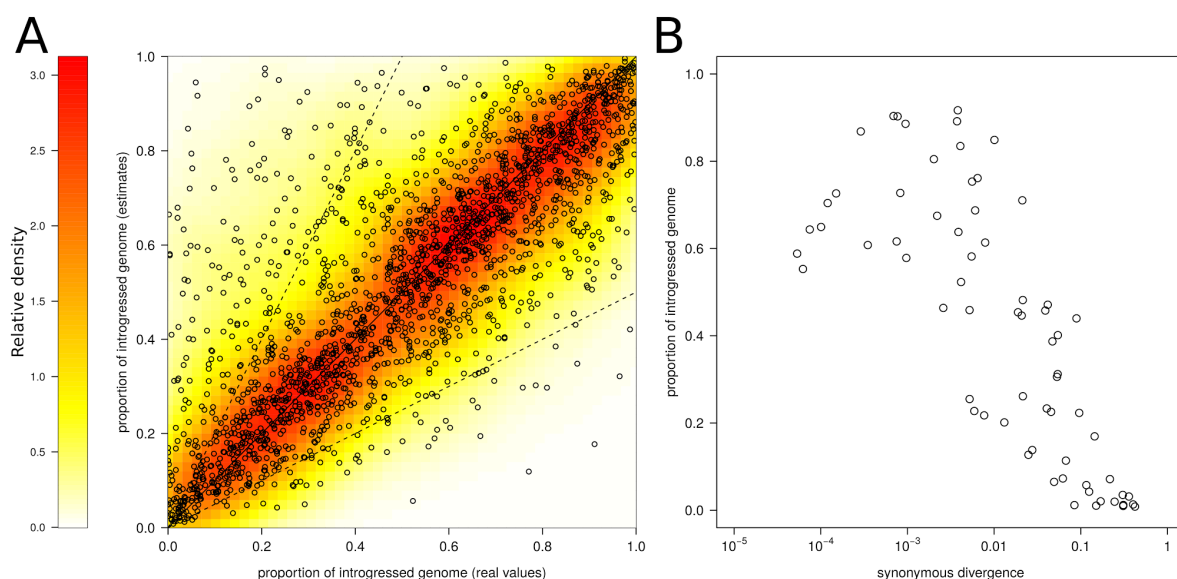

**Figure S8. Estimating  $\alpha$ , the proportion of loci that introgress, under the IM scenario**

2,000 pseudo-observed datasets (PODs) were simulated under the IM scenario with heterogeneity in introgression rates. We estimated the parameters of this scenario by using the ABC approach described in the 'Materials and Methods' section.  $\alpha$  is the proportion of the genome crossing the species barrier at a rate  $N.m > 0$ .

A. x-axis : values of  $\alpha$  used to produce the PODs; y-axis: values of  $\alpha$  estimated by ABC from the simulated PODs.

Solid line represents  $f(x) = x$ .

Dotted lines represent  $f(x) = 2x$  and  $f(x) = x/2$  respectively.

B. Estimated values of  $\alpha$  for the observed pairs of population/species as a function of their net synonymous divergence.

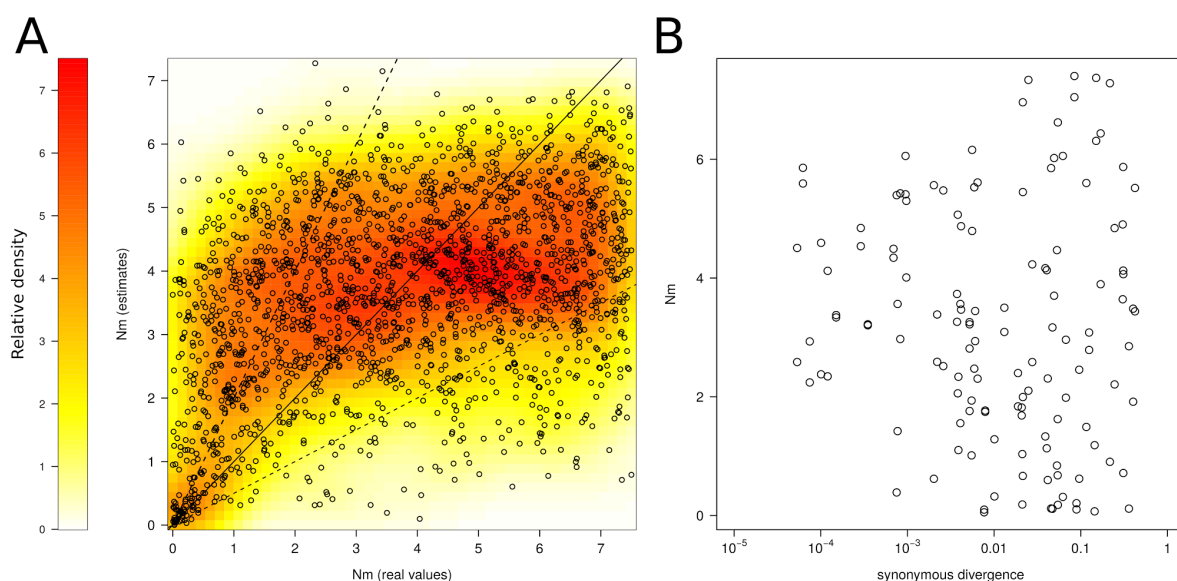

**Figure S9. Estimating  $N.m$ , the effective migration rate, under the IM scenario** 2,000 pseudo-observed datasets (PODs) were simulated under the IM scenario with heterogeneity in introgression rates.

A. x-axis : values of  $N.m$  used to produce the PODs; y-axis: values of  $N.m$  estimated by ABC from the simulated PODs.

Solid line represents  $f(x) = x$ .

Dotted lines represent  $f(x) = 2.x$  and  $f(x) = x/2$  respectively.

B. Estimated values of  $N.m$  for the observed pairs of population/species as a function of their net synonymous divergence.

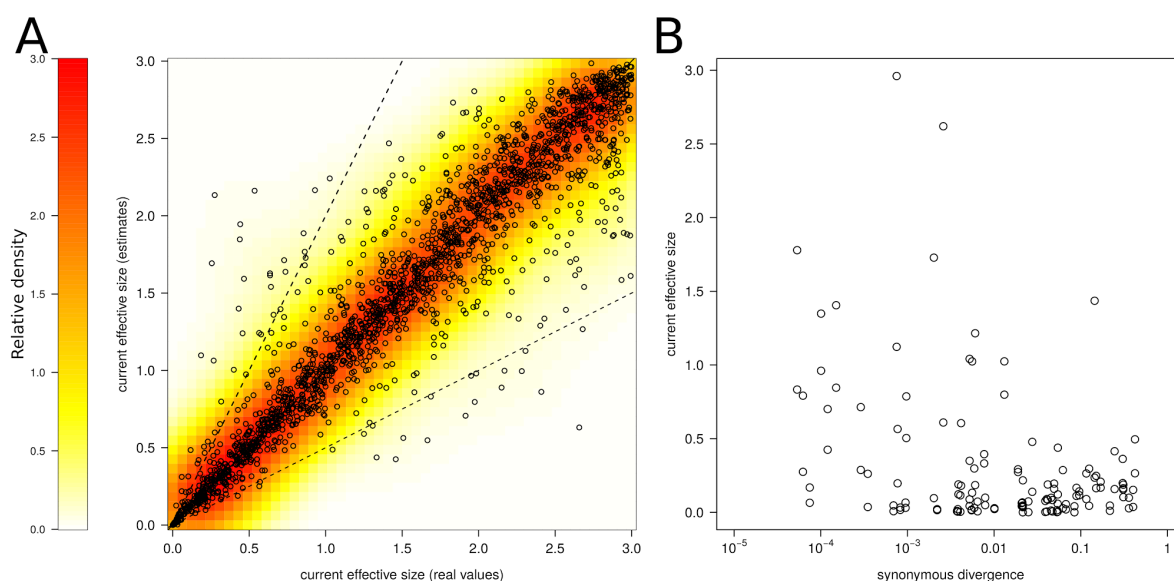

**Figure S10. Estimating  $N$ , the effective population size of daughter populations, under the IM scenario**

2,000 pseudo-observed datasets (PODs) were simulated under the IM scenario with heterogeneity in introgression rates.

A. x-axis : values of  $N$  used to produce the PODs; y-axis: current values of  $N$  estimated by ABC for all PODs.

Solid line represents  $f(x) = x$ .

Dotted lines represent  $f(x) = 2x$  and  $f(x) = x/2$  respectively.

B. Estimated values of  $N$  for the observed pairs of population/species as a function of their net synonymous divergence.

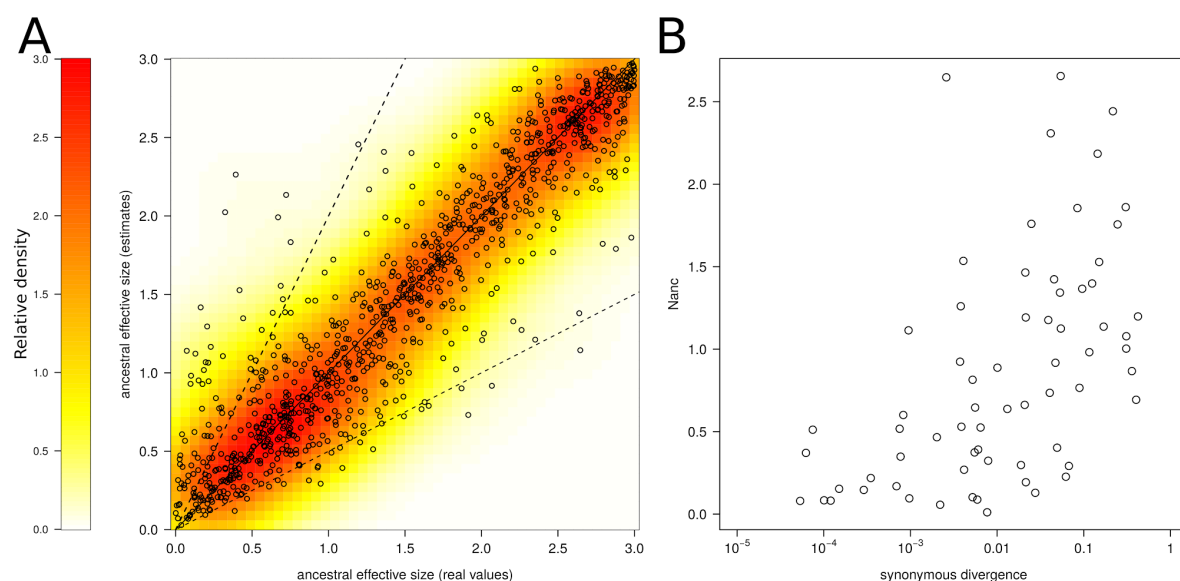

**Figure S11. Estimating  $N_{anc}$ , the effective size of the ancestral population, under the IM scenario**

2,000 pseudo-observed datasets (PODs) were simulated under the IM scenario with heterogeneity in introgression rates.

A. x-axis : values of  $N_{anc}$  used to produce the PODs; y-axis: estimated values of  $N_{anc}$  for all PODs.

Solid line represents  $f(x) = x$ .

Dotted lines represent  $f(x) = 2x$  and  $f(x) = x/2$  respectively.

B. Estimated values of  $N_{anc}$  for the observed pairs of population/species as a function of their net synonymous divergence.

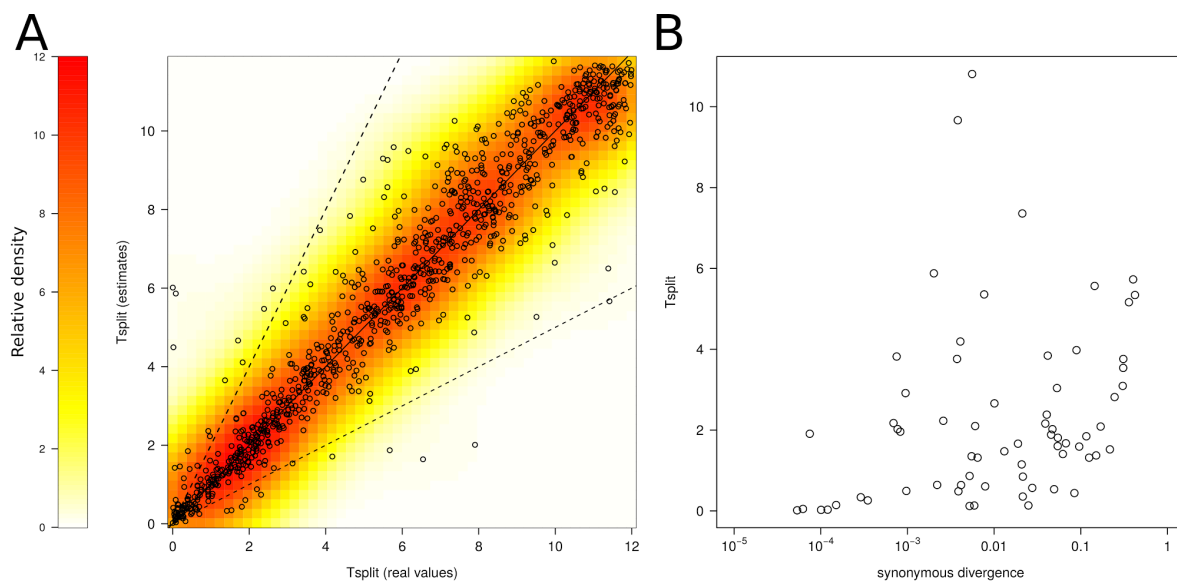

**Figure S12. Estimating *Tsplitt*, the time of ancestral subdivision, under the IM scenario**

2,000 pseudo-observed datasets (PODs) were simulated under the IM scenario with heterogeneity in introgression rates. *Tsplitt* is expressed in million of generations since the ancestral separation.

A. x-axis : values of *Tsplitt* used to produce the PODs; y-axis: estimated values of *Tsplitt* for all PODs.

Solid line represents  $f(x) = x$ .

Dotted lines represent  $f(x) = 2x$  and  $f(x) = x/2$  respectively.

B. Estimated values of *Tsplitt* for the observed pairs of population/species as a function of their net synonymous divergence.
